# Supplementary material for: Litter inputs and standing stocks in riparian zones and streams under secondary forest and managed and abandoned cocoa agroforestry systems
Source: PeerJ. 2022 Dec 1;10:e13787. doi: 10.7717/peerj.13787 (PMC9744167; doi:10.7717/peerj.13787)
Supplement: Supplemental Information 10 — Lateral input (LI), Terrestrial input (TI), Vertical input (VI), Benthic stock (BS) [file peerj-10-13787-s010.xlsx]

## Sheet: TI
AREA	DATE	LEAF (g/m2)	BRANCHES (g/m2)	REPRODUCTIVE MATERIAL (g/m2)	MISCELLANEOUS (g/m2)	SUM (g/m2)
MC	2018-08-01	59.3625	3.9	0	11.1	74.3625
MC	2018-08-01	10.9875	0	0	0	10.9875
MC	2018-08-01	75.5625	0	4.875	15.525	95.9625
MC	2018-08-01	44.55	0	0	3.975	48.525
MC	2018-08-01	58.9875	1.8	30.0375	7.3875	98.2125
MC	2018-08-01	53.775	0	21.975	9.2625	85.0125
MC	2018-08-01	32.5125	0	55.9125	4.6125	93.0375
MC	2018-08-01	52.6875	0	0	14.2875	66.975
MC	2018-08-01	38.475	2.4	81.4125	9.075	131.363
MC	2018-08-01	61.2375	0.75	398.212	14.775	474.975
MC	2018-09-01	147.972	0	15.3103	30.6621	193.945
MC	2018-09-01	87.931	0	0	3.64138	91.5724
MC	2018-09-01	104.566	20.8552	56.5241	37.5724	219.517
MC	2018-09-01	62.0276	0	0	0	62.0276
MC	2018-09-01	111.145	0	4.92414	9.22759	125.297
MC	2018-09-01	39.8897	0	67.9862	5.62759	113.503
MC	2018-09-01	61.0345	0	108.497	2.02759	171.559
MC	2018-09-01	95.131	0	5.58621	29.7931	130.51
MC	2018-09-01	95.6276	5.25517	191.834	5.54483	298.262
MC	2018-09-01	130.552	0	134.234	27.1448	291.931
MC	2018-10-01	46.1818	0	19.4909	20.4	86.0727
MC	2018-10-01	126.764	0	14.5818	12.5455	153.891
MC	2018-10-01	29.8909	6.76364	2.72727	11.7818	51.1636
MC	2018-10-01	38.9091	12.6182	0	0	51.5273
MC	2018-10-01	183.818	4.21818	1.38182	30.2182	219.636
MC	2018-10-01	135.164	0.727273	0	11.8182	147.709
MC	2018-10-01	162.873	0	61.9636	6.65455	231.491
MC	2018-10-01	8.21818	0	0	0	8.21818
MC	2018-10-01	192.545	0	52.1091	18.5818	263.236
MC	2018-10-01	48.7636	0	6.14545	9.49091	64.4
MC	2018-11-01	7.84	0	0	9.08	16.92
MC	2018-11-01	53.44	0	0	4.4	57.84
MC	2018-11-01	9.48	8.44	2.16	6.04	26.12
MC	2018-11-01	47.64	0	0	2.6	50.24
MC	2018-11-01	140.32	6.76	0	6.24	153.32
MC	2018-11-01	15.64	4.36	21.04	4.72	45.76
MC	2018-11-01	6.64	0	0	3.16	9.8
MC	2018-11-01	102.12	12.32	0	9.8	124.24
MC	2018-11-01	81.92	1.4	0.84	2.04	86.2
MC	2018-11-01	32	5.56	0.92	1.76	40.24
MC	2019-01-01	0	0	0	0	0
MC	2019-01-01	46.08	7.78286	332.88	7.78286	394.526
MC	2019-01-01	18.24	3.6	9.84	5.10857	36.7886
MC	2019-01-01	0	0	0	0	0
MC	2019-01-01	0	0	0	0	0
MC	2019-01-01	47.8629	7.61143	26.9143	37.7486	120.137
MC	2019-01-01	0	0	0	0	0
MC	2019-01-01	4.59429	0	0	0	4.59429
MC	2019-01-01	15.1543	4.73143	2.16	7.61143	29.6571
MC	2019-01-01	18.7543	10.9714	0	22.4571	52.1829
MC	2019-02-01	67.3846	9.78462	81.1846	15.6462	174
MC	2019-02-01	19.3846	0	0	2.21538	21.6
MC	2019-02-01	19.1538	0	12.1385	3.27692	34.5692
MC	2019-02-01	6.83077	0	0	0.738462	7.56923
MC	2019-02-01	12.2308	0	0	3.41538	15.6462
MC	2019-02-01	44.1692	0	59.9077	8.81538	112.892
MC	2019-02-01	15.2769	0	0	0	15.2769
MC	2019-02-01	36.7385	8.49231	0	1.98462	47.2154
MC	2019-02-01	19.4308	0.738462	0	1.33846	21.5077
MC	2019-02-01	22.2923	0	0	3.96923	26.2615
MC	2019-03-01	90.44	0	165.88	4.08	260.4
MC	2019-03-01	132.32	9.92	0	6.16	148.4
MC	2019-03-01	43.04	0	8.8	4.72	56.56
MC	2019-03-01	89.64	12.12	85.08	8.56	195.4
MC	2019-03-01	96.04	0	1.6	4.72	102.36
MC	2019-03-01	44.56	0	0	16.92	61.48
MC	2019-03-01	62.92	0	0	11.32	74.24
MC	2019-03-01	75.44	0	29.6	2.84	107.88
MC	2019-03-01	90.52	0	0	0.96	91.48
MC	2019-03-01	121.76	0	0	2.28	124.04
MC	2019-04-01	20.3692	0	0	3.38462	23.7538
MC	2019-04-01	8.83077	0	0	4.61538	13.4462
MC	2019-04-01	50.3077	0	0	2.61538	52.9231
MC	2019-04-01	25.7538	0	0	3.38462	29.1385
MC	2019-04-01	9.75385	0	0	1.29231	11.0462
MC	2019-04-01	51.2	3.63077	3.13846	4.95385	62.9231
MC	2019-04-01	66.7077	0	0	17.2308	83.9385
MC	2019-04-01	65.4154	0	0	8.03077	73.4462
MC	2019-04-01	46.4615	0	0	7.84615	54.3077
MC	2019-04-01	52.3692	3.93846	46	6.06154	108.369
MC	2019-05-01	27.8727	2.89091	0	9.10909	39.8727
MC	2019-05-01	86.2909	6.32727	150.709	15.8727	259.2
MC	2019-05-01	5.56364	0	0	18.6545	24.2182
MC	2019-05-01	88.3091	0	0	21.6545	109.964
MC	2019-05-01	43.4727	0	0	6.98182	50.4545
MC	2019-05-01	19.6364	0	0	4.96364	24.6
MC	2019-05-01	19.5818	0	0	2.72727	22.3091
MC	2019-05-01	38.7273	0	0	0	38.7273
MC	2019-05-01	48.2182	0	0	29.0182	77.2364
MC	2019-05-01	27.2182	0	0	0	27.2182
MC	2019-06-01	23.5714	0	20.3571	18.0429	61.9714
MC	2019-06-01	16.4571	0	0	0	16.4571
MC	2019-06-01	5.91429	0	7.07143	6.21429	19.2
MC	2019-06-01	19.6714	0	3.42857	0	23.1
MC	2019-06-01	21.3	0	7.5	6.08571	34.8857
MC	2019-06-01	5.48571	0	2.95714	1.88571	10.3286
MC	2019-06-01	18.6	0	4.58571	0	23.1857
MC	2019-06-01	48.1286	0	28.1143	0	76.2429
MC	2019-06-01	15.5143	0	2.05714	0	17.5714
MC	2019-06-01	61.6714	10.4143	222.429	216.729	511.243
MC	2019-07-01	17.6914	0	0	3.77143	21.4629
MC	2019-07-01	45.5657	7.68	0	195.394	248.64
MC	2019-07-01	5.58857	0	0	28.1829	33.7714
MC	2019-07-01	14.1257	47.9657	0	25.6114	87.7029
MC	2019-07-01	16.4571	4.83429	0	0	21.2914
MC	2019-07-01	21.9771	4.90286	0	44.8457	71.7257
MC	2019-07-01	23.2114	0	0	3.36	26.5714
MC	2019-07-01	21.9429	0	0	0	21.9429
MC	2019-07-01	16.8	0	0	0	16.8
MC	2019-07-01	11.8286	0	0	0	11.8286
SF	2018-08-01	38.4343	17.7257	0	4.59429	60.7543
SF	2018-08-01	16.7314	0	0	0	16.7314
SF	2018-08-01	18.2057	3.29143	6.96	3.87429	32.3314
SF	2018-08-01	53.1086	0	0	12.7543	65.8629
SF	2018-08-01	29.6571	9.6	0	3.18857	42.4457
SF	2018-08-01	23.52	1.47429	0.102857	6.27429	31.3714
SF	2018-08-01	49.1657	1.50857	9.46286	6.54857	66.6857
SF	2018-08-01	24.1714	0	0	4.32	28.4914
SF	2018-08-01	35.4514	0	9.87429	2.4	47.7257
SF	2018-08-01	32.9486	0	7.26857	12.3771	52.5943
SF	2018-09-01	68.731	8.77241	0	19.8207	97.3241
SF	2018-09-01	26.1931	0	0	3.55862	29.7517
SF	2018-09-01	63.4345	10.469	31.9448	5.25517	111.103
SF	2018-09-01	35.7517	1.24138	0	1.03448	38.0276
SF	2018-09-01	42.2069	1.07586	4.09655	2.93793	50.3172
SF	2018-09-01	26.6069	0	1.11724	10.1379	37.8621
SF	2018-09-01	84.331	59.0483	2.1931	18.0414	163.614
SF	2018-09-01	17.7931	3.84828	0.537931	24.331	46.5103
SF	2018-09-01	41.9172	7.65517	2.77241	2.23448	54.5793
SF	2018-09-01	22.9655	0	2.52414	128.11	153.6
SF	2018-10-01	98.4353	6.76	7.16	13.76	125.32
SF	2018-10-01	54	6.04	0.24	0	54
SF	2018-10-01	101.64	9.52	21.68	14.76	116.4
SF	2018-10-01	68.64	0	0	3.04	71.68
SF	2018-10-01	87.64	2.8	3.08	1.16	88.8
SF	2018-10-01	44.92	9.96	0	14	58.92
SF	2018-10-01	105.4	7.88	12.32	0	105.4
SF	2018-10-01	34.2	0	0	24	58.2
SF	2018-10-01	91.36	19.84	0	27.72	119.08
SF	2018-10-01	90.56	7.72	0	93.56	184.12
SF	2018-11-01	80.08	91.64	3.72	13.56	189
SF	2018-11-01	58.12	1.08	0	13.52	72.72
SF	2018-11-01	72.24	1.24	7.6	2.6	83.68
SF	2018-11-01	42.64	2.4	0	5.68	50.72
SF	2018-11-01	59	8.36	4.56	4.32	76.24
SF	2018-11-01	42.4	5.44	5.12	2.24	55.2
SF	2018-11-01	64.28	5	0	4.52	73.8
SF	2018-11-01	50.68	27.64	0	59.72	138.04
SF	2018-11-01	85.8	3.04	0	3.52	92.36
SF	2018-11-01	52.2	13.4	0	0	65.6
SF	2018-12-01	92.5778	43.2889	2.44444	18.1778	156.489
SF	2018-12-01	45.6	2.97778	0.177778	3.68889	52.4444
SF	2018-12-01	68.1778	0	5.28889	20.7111	94.1778
SF	2018-12-01	75.9111	0	0.4	9.15556	85.4667
SF	2018-12-01	49.6	0	5.37778	5.11111	60.0889
SF	2018-12-01	41.0222	7.6	4.31111	10.2222	63.1556
SF	2018-12-01	35.5556	34.0889	0	13.4222	83.0667
SF	2018-12-01	20.4444	0	0	0	20.4444
SF	2018-12-01	10.9333	0	1.37778	3.02222	15.3333
SF	2018-12-01	52.8	40.1333	0	30	122.933
SF	2019-01-01	25.2686	0.857143	15.5657	106.423	148.114
SF	2019-01-01	2.43429	0	5.82857	61.68	69.9429
SF	2019-01-01	7.71429	0.171429	28.7657	137.28	173.931
SF	2019-01-01	24.5143	0	15.0857	118.286	157.886
SF	2019-01-01	0.994286	2.67429	3.80571	62.16	69.6343
SF	2019-01-01	1.37143	1.64571	8.09143	55.44	66.5486
SF	2019-01-01	2.02286	0	7.54286	53.3143	62.88
SF	2019-01-01	0.822857	0	1.64571	48.3429	50.8114
SF	2019-01-01	0.308571	0.685714	3.87429	56.4	61.2686
SF	2019-01-01	1.64571	0	19.44	74.9143	96
SF	2019-02-01	65.7429	15.8571	0	11.2714	92.8714
SF	2019-02-01	90.2143	5.1	0	5.48571	100.8
SF	2019-02-01	78	6.47143	1.75714	28.9286	115.157
SF	2019-02-01	140.7	1.88571	0	4.28571	146.871
SF	2019-02-01	43.5857	3.25714	1.11429	2.95714	50.9143
SF	2019-02-01	25.0714	0.514286	0.9	2.7	29.1857
SF	2019-02-01	27.4714	4.2	0	9.04286	40.7143
SF	2019-02-01	76.7571	0.471429	0	7.5	84.7286
SF	2019-02-01	37.6714	0	0	7.15714	44.8286
SF	2019-02-01	31.3286	0	0	18.8143	50.1429
SF	2019-03-01	93.7714	0	0	18.1286	111.9
SF	2019-03-01	69.0429	0	0	4.88571	73.9286
SF	2019-03-01	97.5	2.4	0	18.9429	118.843
SF	2019-03-01	66.3	2.87143	0	3.21429	72.3857
SF	2019-03-01	92.5714	1.07143	3.38571	1.15714	98.1857
SF	2019-03-01	18.9429	5.65714	0	5.14286	29.7429
SF	2019-03-01	72	0	2.14286	24.5143	98.6571
SF	2019-03-01	51.4714	4.11429	0	4.71429	60.3
SF	2019-03-01	101.186	1.88571	7.07143	7.11429	117.257
SF	2019-03-01	29.6571	0	1.71429	5.61429	36.9857
SF	2019-04-01	73.3455	11.4909	1.92727	8.47273	95.2364
SF	2019-04-01	35.7455	0	0	3.74545	39.4909
SF	2019-04-01	47.7455	19.6	0	12.4727	79.8182
SF	2019-04-01	53.3455	0	0	4.98182	58.3273
SF	2019-04-01	47.4909	10.1455	2.50909	4.61818	64.7636
SF	2019-04-01	24.4	22.7273	2.25455	5.38182	54.7636
SF	2019-04-01	19.6727	3.16364	5.30909	9.56364	37.7091
SF	2019-04-01	37.8545	0	0	16.7636	54.6182
SF	2019-04-01	23.6	0	5.38182	2.4	31.3818
SF	2019-04-01	56.9455	4.29091	1.45455	16.5455	79.2364
SF	2019-05-01	83.88	16.24	0	5.28	105.4
SF	2019-05-01	17.24	1.72	0	2.2	21.16
SF	2019-05-01	29.2	0	0	5.68	34.88
SF	2019-05-01	10.84	0	0	0	10.84
SF	2019-05-01	29.8	0	4.92	5.6	40.32
SF	2019-05-01	17.76	8.2	0	12.52	38.48
SF	2019-05-01	4.16	0	2.68	4.72	11.56
SF	2019-05-01	22.84	4.72	0	8.32	35.88
SF	2019-05-01	8.68	3.64	8.48	1.68	22.48
SF	2019-05-01	98.44	0	4.76	9.28	112.48
SF	2019-06-01	61.7571	25.6286	0	27.6857	115.071
SF	2019-06-01	23.7857	3.25714	0	0.814286	27.8571
SF	2019-06-01	55.0286	7.45714	1.5	14.1857	78.1714
SF	2019-06-01	33.7286	1.84286	0	3.51429	39.0857
SF	2019-06-01	30.3857	2.14286	0	11.8286	44.3571
SF	2019-06-01	33.0429	0	0	4.41429	37.4571
SF	2019-06-01	5.01429	0	0.642857	2.57143	8.22857
SF	2019-06-01	17.4429	0	0	2.95714	20.4
SF	2019-06-01	39.9429	0	2.82857	4.45714	47.2286
SF	2019-06-01	17.9143	0	2.22857	15.0429	35.1857
SF	2019-07-01	47.5636	25.7091	0	11.2364	84.5091
SF	2019-07-01	41.9273	0	0	3.63636	45.5636
SF	2019-07-01	40.8	13.0545	0	18.6545	72.5091
SF	2019-07-01	20.5818	12.8727	0	13.3818	46.8364
SF	2019-07-01	46.5455	7.27273	4.14545	6.94545	64.9091
SF	2019-07-01	176.727	0	0	44	220.727
SF	2019-07-01	12.4727	7.56364	0	6.50909	26.5455
SF	2019-07-01	21.3818	5.49091	1.89091	4.47273	33.2364
SF	2019-07-01	30.3273	0	3.12727	3.41818	36.8727
AC	2018-08-01	51.8743	6.96	0.377143	2.02286	61.2343
AC	2018-08-01	31.7143	8.98286	55.3714	10.6629	106.731
AC	2018-08-01	38.0914	49.2	0	12.6857	99.9771
AC	2018-08-01	56.1257	3.77143	0	18.9943	78.8914
AC	2018-08-01	51.12	0	0	0	51.12
AC	2018-08-01	94.3543	9.87429	12.3771	34.2171	150.823
AC	2018-08-01	42.4457	10.08	0	39.7029	92.2286
AC	2018-08-01	18.24	17.1429	0	20.9486	56.3314
AC	2018-08-01	63.12	0	1.06286	5.14286	69.3257
AC	2018-08-01	96.5143	6.85714	0	31.0971	134.469
AC	2018-09-01	75.52	0	0	18.56	94.08
AC	2018-09-01	92.68	0	1.24	2.48	96.4
AC	2018-09-01	77	41.48	0	5.64	124.12
AC	2018-09-01	276.6	21.76	4.24	27.8	330.4
AC	2018-09-01	134.2	38.96	25.36	36.32	234.84
AC	2018-09-01	89.48	12.04	0	28.48	130
AC	2018-09-01	58.52	74.56	69.68	15.48	218.24
AC	2018-09-01	63.48	17.8	4.08	40.92	126.28
AC	2018-09-01	111.64	37.84	19.8	26.08	195.36
AC	2018-09-01	58.2	12.16	0.24	36.36	106.96
AC	2018-10-01	48.3636	0.363636	0	2.61818	51.3455
AC	2018-10-01	106.4	0	0	6.25455	112.655
AC	2018-10-01	77.8182	28.0727	2.61818	9.89091	118.4
AC	2018-10-01	105.164	9.2	2.36364	13.5273	130.255
AC	2018-10-01	68.1818	7.92727	7.81818	17.1636	101.091
AC	2018-10-01	119.6	41.2364	4.36364	20.8	186
AC	2018-10-01	75.1636	67.0545	29.2727	24.4364	195.927
AC	2018-10-01	59.9273	8.07273	0	28.0727	96.0727
AC	2018-10-01	75.1273	23.6364	7.09091	31.7091	137.564
AC	2018-10-01	67.0909	13.5273	0	35.3455	115.964
AC	2018-11-01	15.5586	0	0	3.06207	18.6207
AC	2018-11-01	158.938	0.331034	0	41.5034	200.772
AC	2018-11-01	98.7724	6.62069	0.124138	13.3241	118.841
AC	2018-11-01	192.662	18.9103	2.52414	46.3448	260.441
AC	2018-11-01	70.6759	5.25517	0.951724	5.66897	82.5517
AC	2018-11-01	58.3034	0.703448	0.62069	13.6552	73.2828
AC	2018-11-01	88.1379	34.0966	2.52414	28.7586	153.517
AC	2018-11-01	97.1172	19.8621	0	34.9241	151.903
AC	2018-11-01	56.731	38.1103	0	10.2207	105.062
AC	2018-11-01	39.7655	16.0138	0	29.9586	85.7379
AC	2018-12-01	20.58	0	0	8.64	29.22
AC	2018-12-01	48.39	25.05	2.58	12.39	88.41
AC	2018-12-01	131.73	19.08	0.75	13.11	164.67
AC	2018-12-01	114.33	17.97	2.7	34.47	169.47
AC	2018-12-01	165.9	8.25	6.03	12.39	192.57
AC	2018-12-01	88.35	2.34	3.48	15.9	110.07
AC	2018-12-01	322.77	1.29	0.09	15.27	339.42
AC	2018-12-01	24.27	0	0.69	14.61	39.57
AC	2018-12-01	56.43	0	0	6.09	62.52
AC	2018-12-01	47.58	8.67	0.39	20.76	77.4
AC	2019-01-01	46.5103	0	0	6.74483	53.2552
AC	2019-01-01	69.4345	16.6345	4.17931	15.4345	105.683
AC	2019-01-01	55.1586	12.4966	0.413793	6.91034	74.9793
AC	2019-01-01	77.0897	6.49655	0.496552	12.7862	96.869
AC	2019-01-01	147.724	28.0138	0	6.08276	181.821
AC	2019-01-01	86.4414	0	1.28276	8.15172	95.8759
AC	2019-01-01	36.0414	7.15862	27.7241	11.3379	82.2621
AC	2019-01-01	67.4069	20.3586	0	29.8759	117.641
AC	2019-01-01	73.6138	11.8345	0	6.33103	91.7793
AC	2019-01-01	58.0138	26.6483	0	13.6552	98.3172
AC	2019-02-01	85.7067	0	0	11.68	97.3867
AC	2019-02-01	66.64	23.6	0.453333	14.9333	105.627
AC	2019-02-01	30.6667	18.2667	0	6.16	55.0933
AC	2019-02-01	79.5733	14.1333	1.92	23.6267	119.253
AC	2019-02-01	39.0133	4.61333	4.05333	18.8533	66.5333
AC	2019-02-01	34.5067	1.46667	2.16	8.82667	46.96
AC	2019-02-01	44.2133	8.61333	11.0133	7.33333	71.1733
AC	2019-02-01	98.6667	5.41333	0	24.96	129.04
AC	2019-02-01	175.44	27.0667	0	37.7067	240.213
AC	2019-02-01	56.8	24.1333	1.70667	25.6533	108.293
AC	2019-03-01	53.2114	0	0	15.4971	68.7086
AC	2019-03-01	22.6286	9.70286	0	38.7429	71.0743
AC	2019-03-01	13.5771	19.4057	1.81714	8.05714	42.8571
AC	2019-03-01	44.2629	8.84571	3.32571	17.2457	73.68
AC	2019-03-01	48.8914	0	4.08	19.0629	72.0343
AC	2019-03-01	33.5314	0	6.68571	5.76	45.9771
AC	2019-03-01	20.6057	0	3.6	9.49714	33.7029
AC	2019-03-01	76.0457	0	0	38.4	114.446
AC	2019-03-01	45.7029	5.41714	0	5.14286	56.2629
AC	2019-03-01	4.18286	0	0	0.171429	4.35429
AC	2019-04-01	48.7149	0	0	1.91489	50.6298
AC	2019-04-01	16.9787	2.91064	1.78723	4.54468	26.2213
AC	2019-04-01	41.1319	11.8213	0	5.97447	58.9277
AC	2019-04-01	66.0766	13.0468	20.8085	15.0894	115.021
AC	2019-04-01	30.0511	3.75319	8.29787	6.38298	48.4851
AC	2019-04-01	19.6596	6.79149	0	9.70213	36.1532
AC	2019-04-01	26.6553	18.5617	0	12.3319	57.5489
AC	2019-04-01	35.7702	21.2426	0	8.22128	65.234
AC	2019-04-01	35.617	27.5745	0	15.9319	79.1234
AC	2019-04-01	61.1745	36.4085	3.29362	8.4766	109.353
AC	2019-06-01	21.96	0	0	9.84	31.8
AC	2019-06-01	19.4	7.08	69.64	4.84	100.96
AC	2019-06-01	19.24	16.24	0	2.12	37.6
AC	2019-06-01	36.44	11.76	7.84	9.04	65.08
AC	2019-06-01	22.76	0	11.16	14.36	48.28
AC	2019-06-01	28	0	27.88	0	55.88
AC	2019-06-01	17.08	5.12	36.4	0	58.6
AC	2019-06-01	32.64	3.92	0	13.36	49.92
AC	2019-06-01	36.08	0	0	2.52	38.6
AC	2019-06-01	42.44	9.36	0	8.12	59.92
AC	2019-07-01	24.3111	0	3.42222	16.7556	44.4889
AC	2019-07-01	31.4222	3.68889	73.1111	12.9333	121.156
AC	2019-07-01	21.9556	2.48889	0	4.4	28.8444
AC	2019-07-01	46.2222	8.44444	6.88889	25.3333	86.8889
AC	2019-07-01	30.6667	0	18.9778	24.7111	74.3556
AC	2019-07-01	28.3556	3.28889	0	2.35556	34
AC	2019-07-01	20.2222	0	0	25.5556	45.7778
AC	2019-07-01	32.8	6.31111	0	11.6444	50.7556
AC	2019-07-01	26.5333	5.24444	0	4.04444	35.8222
AC	2019-07-01	33.8667	19.4667	0	14.1333	67.4667

## Sheet: LI
AREA	DATE	LEAF (g/m2)	BRANCHES (g/m2)	REPRODUCTIVE MATERIAL (g/m2)	MISCELLANEOUS (g/m2)	SUM (g/m2)
MC	2018-08-01	23.75	0	0	13	36.75
MC	2018-08-01	0	0	0	0	0
MC	2018-08-01	103.75	0	185.5	292.75	582
MC	2018-08-01	0	0	0	0	0
MC	2018-08-01	43.125	0	0	16.25	59.375
MC	2018-08-01	39.875	6.125	0	75	121
MC	2018-08-01	3.875	0	0	6.375	10.25
MC	2018-08-01	15.375	11.25	0	0	26.625
MC	2018-08-01	15.5	0	0	6.125	21.625
MC	2018-08-01	2.875	4.25	0	0	7.125
MC	2018-09-01	108.414	0	0	20.1379	128.552
MC	2018-09-01	17.5172	0	0	0	17.5172
MC	2018-09-01	28.4138	0	12.6897	9.65517	50.7586
MC	2018-09-01	0	0	0	0	0
MC	2018-09-01	153.793	0	113.931	7.58621	275.31
MC	2018-09-01	47.5862	0	0	0	47.5862
MC	2018-09-01	18.3448	0	74.6207	4.55172	97.5172
MC	2018-09-01	9.10345	0	0	0	9.10345
MC	2018-09-01	18.069	0	0	7.17241	25.2414
MC	2018-09-01	0	0	0	0	0
MC	2018-10-01	0	0	0	1.33333	1.33333
MC	2018-10-01	29.2121	0	0	0.969697	30.1818
MC	2018-10-01	55.5152	0	0	0	55.5152
MC	2018-10-01	0	0	0	1.21212	1.21212
MC	2018-10-01	148.364	0	0	11.6364	160
MC	2018-10-01	103.394	3.75758	0	0	107.152
MC	2018-10-01	76.2424	0	0	0	76.2424
MC	2018-10-01	278.303	0	0	91.0303	369.333
MC	2018-10-01	24.3636	11.5152	0	1.69697	37.5758
MC	2018-10-01	73.3333	0	0	9.57576	82.9091
MC	2018-11-01	9.46667	0	0	6	15.4667
MC	2018-11-01	41.4667	0	0	0.666667	42.1333
MC	2018-11-01	150	6	388.933	270.933	815.867
MC	2018-11-01	0	0	0	0	0
MC	2018-11-01	192.4	33.8667	57.6	246.267	530.133
MC	2018-11-01	10.2667	4.66667	0	3.33333	18.2667
MC	2018-11-01	91.8667	0	39.2	2.66667	133.733
MC	2018-11-01	115.867	8	0	6.26667	130.133
MC	2018-11-01	16.1333	0	0	1.06667	17.2
MC	2018-11-01	8.8	0	0	1.06667	9.86667
MC	2019-01-01	0	0	0	12.4571	12.4571
MC	2019-01-01	0	0	26.7429	6.62857	33.3714
MC	2019-01-01	33.7143	0	4	17.7143	55.4286
MC	2019-01-01	127.2	33.7143	0	171.657	332.571
MC	2019-01-01	0	0	0	0	0
MC	2019-01-01	23.5429	13.3714	72.4571	50.0571	159.429
MC	2019-01-01	0	0	0	0	0
MC	2019-01-01	41.1429	29.3714	0	80.5714	151.086
MC	2019-01-01	0	0	0	14.6286	14.6286
MC	2019-01-01	99.6571	103.429	0	32.4571	235.543
MC	2019-02-01	32	0	0	1.84615	33.8462
MC	2019-02-01	70	2	0	25.0769	97.0769
MC	2019-02-01	19.8462	0	0	3.38462	23.2308
MC	2019-02-01	128.308	13.5385	0	36	177.846
MC	2019-02-01	27.2308	0	56.7692	12.1538	96.1538
MC	2019-02-01	6.46154	0	0	4.61538	11.0769
MC	2019-02-01	93.2308	0	8.46154	18	119.692
MC	2019-02-01	20.7692	2.76923	0	0	23.5385
MC	2019-02-01	34.1538	0	0	5.69231	39.8462
MC	2019-02-01	25.2308	0	0	2.61538	27.8462
MC	2019-03-01	44.2667	0	0	0	44.2667
MC	2019-03-01	86.1333	0	0	16.2667	102.4
MC	2019-03-01	25.4667	0	50.2667	11.4667	87.2
MC	2019-03-01	53.7333	12.1333	47.7333	9.06667	122.667
MC	2019-03-01	76.4	0	11.6	8.66667	96.6667
MC	2019-03-01	49.0667	0	0	0	49.0667
MC	2019-03-01	81.4667	0	0	5.06667	86.5333
MC	2019-03-01	90.1333	0	38.1333	0.8	129.067
MC	2019-03-01	112.267	0	0	6.26667	118.533
MC	2019-03-01	111.067	0	0	2.93333	114
MC	2019-04-01	42.9744	0	0	12.4103	55.3846
MC	2019-04-01	19.4872	0	0	1.02564	20.5128
MC	2019-04-01	35.3846	0	0	1.12821	36.5128
MC	2019-04-01	58.2564	0	0	2.66667	60.9231
MC	2019-04-01	54.5641	0	5.02564	5.53846	65.1282
MC	2019-04-01	26.6667	0	0	0	26.6667
MC	2019-04-01	21.8462	0	0	5.12821	26.9744
MC	2019-04-01	26.2564	0	67.0769	5.33333	98.6667
MC	2019-04-01	81.5385	0	0	11.8974	93.4359
MC	2019-04-01	84.3077	0	12.9231	10.6667	107.897
MC	2019-05-01	71.4545	0	0	9.09091	80.5455
MC	2019-05-01	109.818	0	55.2727	0	165.091
MC	2019-05-01	49.4545	0	0	29.6364	79.0909
MC	2019-05-01	102	0	0	7.27273	109.273
MC	2019-05-01	40.1818	29.8182	22	65.2727	157.273
MC	2019-05-01	53.4545	0	0	0	53.4545
MC	2019-05-01	440.909	0	0	23.4545	464.364
MC	2019-05-01	97.6364	0	0	31.4545	129.091
MC	2019-05-01	119.455	0	0	0	119.455
MC	2019-05-01	73.0909	0	0	0	73.0909
MC	2019-06-01	40.8571	0	0	0	40.8571
MC	2019-06-01	51.1429	0	0	0	51.1429
MC	2019-06-01	49.2857	0	0	28.5714	77.8571
MC	2019-06-01	46.8571	0	0	19.8571	66.7143
MC	2019-06-01	21.5714	0	90.1429	0	111.714
MC	2019-06-01	45.2857	0	0	0	45.2857
MC	2019-06-01	80.7143	0	0	0	80.7143
MC	2019-06-01	57.8571	0	7	1.71429	66.5714
MC	2019-06-01	38.7143	0	0	0	38.7143
MC	2019-06-01	63.8571	0	0	0	63.8571
MC	2019-07-01	20.8	0	0	0	20.8
MC	2019-07-01	83.7714	0	0	0	83.7714
MC	2019-07-01	83.7714	9.48571	0	0	93.2571
MC	2019-07-01	170.4	29.9429	0	0	200.343
MC	2019-07-01	18.2857	0	0	0	18.2857
MC	2019-07-01	42.6286	86.5143	0	11.4286	140.571
MC	2019-07-01	46.0571	0	0	0	46.0571
MC	2019-07-01	9.02857	19.5429	0	0	28.5714
MC	2019-07-01	0	0	0	0	0
MC	2019-07-01	33.0286	0	0	0	33.0286
SF	2018-08-01	75.3473	17.7979	1.6262	15.2682	110.04
SF	2018-08-01	14.2744	0	0	0	14.2744
SF	2018-08-01	22.044	0	2.52964	3.79447	28.3682
SF	2018-08-01	6.41446	0	0	0	6.41446
SF	2018-08-01	38.8481	0	0	0	38.8481
SF	2018-08-01	9.84754	0	0	0	9.84754
SF	2018-08-01	23.8509	0	0	0	23.8509
SF	2018-08-01	3.70412	0	0	4.42688	8.131
SF	2018-08-01	4.8786	0	0	8.31169	13.1903
SF	2018-08-01	24.2123	0	0	0	24.2123
SF	2018-09-01	48.9573	11.1217	0	2.3988	62.4779
SF	2018-09-01	0	0	0	0	0
SF	2018-09-01	41.87	0	0	9.48617	51.3561
SF	2018-09-01	0	0	0	0	0
SF	2018-09-01	11.4488	0	0	0	11.4488
SF	2018-09-01	4.57953	0	0	0	4.57953
SF	2018-09-01	41.6519	34.4555	0	0	76.1074
SF	2018-09-01	1.74458	0	0	0	1.74458
SF	2018-09-01	17.991	0	0	0	17.991
SF	2018-09-01	40.5615	0	0	0	40.5615
SF	2018-10-01	37.2937	24.137	0	39.4203	105.823
SF	2018-10-01	43.4256	0	0	3.37286	46.7984
SF	2018-10-01	79.0514	0	0	3.05665	82.108
SF	2018-10-01	1.37022	0	0	22.556	23.9262
SF	2018-10-01	10.6456	0	0	0	10.6456
SF	2018-10-01	17.4967	4.74308	0	0	22.2398
SF	2018-10-01	20.2372	0	0	13.386	33.6232
SF	2018-10-01	4.84848	0	0	0	43.531
SF	2018-10-01	33.0962	34.0448	0	0	67.141
SF	2018-10-01	2.84585	20.448	0	0	23.2938
SF	2018-11-01	75.9947	17.1805	0	1.37022	94.5455
SF	2018-11-01	43.531	1.15942	0	4.11067	48.8011
SF	2018-11-01	56.39	10.224	0	4.42688	71.0408
SF	2018-11-01	0	0	0	0	0
SF	2018-11-01	39.8419	0	0	0	39.8419
SF	2018-11-01	33.5178	0	0	0	33.5178
SF	2018-11-01	28.0369	34.2556	0	0	62.2925
SF	2018-11-01	14.3347	0	0	0	14.3347
SF	2018-11-01	22.3452	0	0	0	22.3452
SF	2018-11-01	46.3768	0	0	0	46.3768
SF	2018-12-01	73.0786	9.01771	0	6.79256	88.8889
SF	2018-12-01	69.4481	0	0	4.56741	74.0155
SF	2018-12-01	42.6292	3.39628	0	18.621	64.6465
SF	2018-12-01	76.1236	7.84658	0	8.78349	92.7536
SF	2018-12-01	35.4853	0	2.45938	21.0804	59.025
SF	2018-12-01	21.3146	0	0	3.27917	24.5938
SF	2018-12-01	8.54926	0	0	5.38721	13.9365
SF	2018-12-01	12.7653	0	0	0	12.7653
SF	2018-12-01	17.9183	0	0	8.66637	26.5847
SF	2018-12-01	41.4581	0.819792	0	0	42.2779
SF	2019-01-01	38.6674	82.3038	0	0.903444	121.875
SF	2019-01-01	30.3557	0	0	0	30.3557
SF	2019-01-01	80.0452	37.9447	0	1.6262	119.616
SF	2019-01-01	10.751	0	0	0	10.751
SF	2019-01-01	54.4777	0	0	1.17448	55.6522
SF	2019-01-01	18.0689	0	0	0	18.0689
SF	2019-01-01	25.2061	0	0	2.34896	27.5551
SF	2019-01-01	9.12479	0	0	0	9.12479
SF	2019-01-01	20.9599	0	0	0	20.9599
SF	2019-01-01	10.6606	0	0	0	10.6606
SF	2019-02-01	62.2247	24.8447	0	2.37154	89.441
SF	2019-02-01	56.917	0	0	0	56.917
SF	2019-02-01	62.1118	0	0	8.80858	70.9204
SF	2019-02-01	16.7137	0	0	0	16.7137
SF	2019-02-01	19.3111	0	0	3.95257	23.2637
SF	2019-02-01	8.24393	0	0	0	8.24393
SF	2019-02-01	164.427	16.1491	0	33.9921	214.568
SF	2019-02-01	5.75946	0	0	0	5.75946
SF	2019-02-01	48.5601	0	8.35686	3.27499	60.192
SF	2019-02-01	17.7301	0	0	0	17.7301
SF	2019-03-01	69.3394	6.54997	0	0	75.8893
SF	2019-03-01	27.2163	0	0	0	27.2163
SF	2019-03-01	67.9842	0	0	2.14568	70.1299
SF	2019-03-01	9.5991	1.91982	0	0	11.5189
SF	2019-03-01	60.6437	0	0	10.3896	71.0333
SF	2019-03-01	10.5025	0	0	9.5991	20.1016
SF	2019-03-01	25.4094	0	0	6.54997	31.9593
SF	2019-03-01	15.0198	0	0	0	15.0198
SF	2019-03-01	9.14737	0	0	0	9.14737
SF	2019-03-01	21.118	0	0	0	21.118
SF	2019-04-01	50.9762	13.8939	0	0	64.87
SF	2019-04-01	17.2476	0	0	0	17.2476
SF	2019-04-01	76.2726	0	0	0	76.2726
SF	2019-04-01	13.7022	0	0	0	13.7022
SF	2019-04-01	22.8051	0	0	0	22.8051
SF	2019-04-01	6.13247	0	0	0	6.13247
SF	2019-04-01	55.5755	0	0	1.4373	57.0128
SF	2019-04-01	9.58199	0	0	0.958199	10.5402
SF	2019-04-01	1.82058	0	0	0	1.82058
SF	2019-04-01	7.47395	0	0	0	7.47395
SF	2019-05-01	99.9209	51.3307	0	57.971	209.223
SF	2019-05-01	26.1397	0	0	0	26.1397
SF	2019-05-01	29.8287	0	0	39.6311	69.4598
SF	2019-05-01	31.6206	4.21607	0	7.27273	43.1094
SF	2019-05-01	26.3505	0	0	17.2859	43.6364
SF	2019-05-01	5.16469	0	0	0	5.16469
SF	2019-05-01	42.7931	13.913	0	7.69433	64.4005
SF	2019-05-01	9.06456	0	0	0	9.06456
SF	2019-05-01	15.3887	0	0	0	15.3887
SF	2019-05-01	12.7536	0	0	0	12.7536
SF	2019-06-01	35.6861	0	0	5.42067	41.1067
SF	2019-06-01	7.79221	0	0	0	7.79221
SF	2019-06-01	10.2767	0	0	0	10.2767
SF	2019-06-01	25.8611	0	0	4.17843	30.0395
SF	2019-06-01	41.4455	0	0	3.72671	45.1722
SF	2019-06-01	11.2931	0	1.12931	0	12.4224
SF	2019-06-01	15.4715	0	0	3.38792	18.8594
SF	2019-06-01	17.956	0	0	0	17.956
SF	2019-06-01	21.9085	0	0	0	21.9085
SF	2019-06-01	10.3896	0	0	0	10.3896
SF	2019-07-01	23.8911	0	0	5.81307	29.7042
SF	2019-07-01	18.7168	0	0	0	18.7168
SF	2019-07-01	21.8469	0	0	1.98028	23.8272
SF	2019-07-01	12.2011	0	0	4.40771	16.6088
SF	2019-07-01	17.1837	0	0	0	17.1837
SF	2019-07-01	40.1805	34.9423	14.9479	63.2411	153.312
SF	2019-07-01	6.26023	0	0	6.51575	12.776
SF	2019-07-01	12.9676	0	0	0	12.9676
SF	2019-07-01	0	0	0	0	0
SF	2019-07-01	4.47159	0	0	0	4.47159
AC	2018-08-01	60.6736	0	10.4065	17.6539	88.734
AC	2018-08-01	13.7515	0	0	0	13.7515
AC	2018-08-01	1.8583	0	0	5.11034	6.96864
AC	2018-08-01	0	0	0	0	0
AC	2018-08-01	11.6144	0	0	0	11.6144
AC	2018-08-01	14.5877	0	0	1.57956	16.1672
AC	2018-08-01	9.38444	0	1.2079	1.8583	12.4506
AC	2018-08-01	10.6852	0	0	0	10.6852
AC	2018-08-01	43.5772	0	0	5.76074	49.338
AC	2018-08-01	7.15447	0	0	0	7.15447
AC	2018-09-01	27.8591	0	0	2.49322	30.3523
AC	2018-09-01	10.0813	0	0	0	10.0813
AC	2018-09-01	8.67209	0	0	1.30081	9.9729
AC	2018-09-01	39.3496	0	0	0	39.3496
AC	2018-09-01	31.0027	0	0	4.33604	35.3388
AC	2018-09-01	26.4499	8.23848	0	6.72087	41.4092
AC	2018-09-01	30.3523	0	0	0	30.3523
AC	2018-09-01	9.6477	0	1.40921	2.60163	13.6585
AC	2018-09-01	46.9377	0	0	0	46.9377
AC	2018-09-01	8.67209	0	0	0	8.67209
AC	2018-10-01	5.81424	0	0	0	5.81424
AC	2018-10-01	21.0889	0	0	0	21.0889
AC	2018-10-01	0	0	0	0	0
AC	2018-10-01	37.152	0	0	0	37.152
AC	2018-10-01	11.9241	0	0	0	11.9241
AC	2018-10-01	14.8805	0	0	0	14.8805
AC	2018-10-01	23.1584	0	0	0	23.1584
AC	2018-10-01	8.96773	0	0	0	8.96773
AC	2018-10-01	29.4654	0	0	0	29.4654
AC	2018-10-01	21.3846	0	0	0	21.3846
AC	2018-11-01	8.52257	0.897112	0	3.58845	13.0081
AC	2018-11-01	30.1654	0	0	13.1203	43.2857
AC	2018-11-01	6.72834	0	0	0	6.72834
AC	2018-11-01	16.933	0	0	1.34567	18.2787
AC	2018-11-01	12.896	6.27979	0	4.48556	23.6613
AC	2018-11-01	18.0544	0	0	0	18.0544
AC	2018-11-01	4.26128	0	0	1.34567	5.60695
AC	2018-11-01	23.5492	0	0	2.0185	25.5677
AC	2018-11-01	31.5111	0	6.84048	2.13064	40.4822
AC	2018-12-01	22.1951	6.50407	0	0	28.6992
AC	2018-12-01	52.1951	6.09756	0	3.82114	62.1138
AC	2018-12-01	4.22764	0	0	0	4.22764
AC	2018-12-01	9.7561	0	1.95122	3.98374	15.6911
AC	2018-12-01	5.44715	0	0	0	5.44715
AC	2018-12-01	41.8699	0	0	0.406504	42.2764
AC	2018-12-01	12.9268	0	0	6.01626	18.9431
AC	2018-12-01	18.5366	0	0	3.17073	21.7073
AC	2018-12-01	8.86179	0	0	0	8.86179
AC	2018-12-01	2.52033	10.5691	0	1.05691	14.1463
AC	2019-01-01	23.5492	0	1.34567	13.0081	37.903
AC	2019-01-01	49.6776	0	0	3.13989	52.8175
AC	2019-01-01	5.27054	0	0	0	5.27054
AC	2019-01-01	32.0718	4.93412	0	2.24278	39.2487
AC	2019-01-01	5.04626	0	0	1.79422	6.84048
AC	2019-01-01	78.4973	5.49481	0	4.82198	88.8141
AC	2019-01-01	0	0	0	0	0
AC	2019-01-01	62.125	0	0	0	62.125
AC	2019-01-01	0	0	0	0	0
AC	2019-01-01	17.718	0.897112	0	0	18.6151
AC	2019-02-01	84.6974	0	0	5.13098	89.8284
AC	2019-02-01	2.24029	0	0	0	2.24029
AC	2019-02-01	16.1156	2.31256	0	0	18.4282
AC	2019-02-01	0	0	0	0	0
AC	2019-02-01	0	0	0	5.63686	5.63686
AC	2019-02-01	17.6332	99.2231	0	0	116.856
AC	2019-02-01	47.6242	4.48058	0	0	52.1048
AC	2019-02-01	29.4128	0	21.6079	2.16802	53.1888
AC	2019-02-01	15.9711	0	0	7.58808	23.5592
AC	2019-02-01	0	0	0	0	0
AC	2019-03-01	29.7329	0	0	1.30081	31.0337
AC	2019-03-01	20.6272	0	0	0.929152	21.5563
AC	2019-03-01	6.78281	0	0	1.2079	7.99071
AC	2019-03-01	5.01742	0	31.6841	1.57956	38.2811
AC	2019-03-01	9.29152	0	0	1.67247	10.964
AC	2019-03-01	8.08362	0	0	0	8.08362
AC	2019-03-01	37.5377	0	0	0	37.5377
AC	2019-03-01	4.83159	0	0	0	4.83159
AC	2019-03-01	21.6492	0	0	3.71661	25.3659
AC	2019-03-01	160.372	34.5645	61.6028	46.7364	303.275
AC	2019-04-01	40.8234	25.0476	10.6556	15.7066	92.2332
AC	2019-04-01	46.7739	0	0	0	46.7739
AC	2019-04-01	1.45304	0	0	0	1.45304
AC	2019-04-01	8.37225	0	13.9768	6.71164	29.0607
AC	2019-04-01	5.18941	4.77426	0	1.52223	11.4859
AC	2019-04-01	3.39042	0	0	1.31465	4.70507
AC	2019-04-01	11.1399	6.64245	0	2.35253	20.1349
AC	2019-04-01	12.247	0	0	0	12.247
AC	2019-04-01	14.7379	0	0	5.67376	20.4117
AC	2019-04-01	3.80557	6.08891	0	1.59142	11.4859
AC	2019-06-01	40.8234	25.0476	10.6556	15.7066	92.2332
AC	2019-06-01	46.7739	0	0	0	46.7739
AC	2019-06-01	1.45304	0	0	0	1.45304
AC	2019-06-01	8.37225	0	13.9768	6.71164	29.0607
AC	2019-06-01	5.18941	4.77426	0	1.52223	11.4859
AC	2019-06-01	3.39042	0	0	1.31465	4.70507
AC	2019-06-01	11.1399	6.64245	0	2.35253	20.1349
AC	2019-06-01	12.247	0	0	0	12.247
AC	2019-06-01	14.7379	0	0	5.67376	20.4117
AC	2019-06-01	3.80557	6.08891	0	1.59142	11.4859
AC	2019-07-01	33.7248	0	0	0	33.7248
AC	2019-07-01	22.162	0	0	0	22.162
AC	2019-07-01	3.49292	0	0	0	3.49292
AC	2019-07-01	5.05872	8.55164	0	0	13.6104
AC	2019-07-01	5.17916	0	0	0	5.17916
AC	2019-07-01	7.22674	0	0	0	7.22674
AC	2019-07-01	10.7197	0	0	0	10.7197
AC	2019-07-01	36.3746	2.6498	0	0	39.0244
AC	2019-07-01	3.37248	0	0	0	3.37248

## Sheet: VI
AREA	DATE	LEAF (g/m2)	BRANCHES (g/m2)	REPRODUCTIVE MATERIAL (g/m2)	MISCELLANEOUS (g/m2)	SUM (g/m2)
CM	2018-08-01	20.966	0	0	0	20.966
CM	2018-08-01	32.6433	0	0	0	32.6433
CM	2018-08-01	26.8047	0	0	0	26.8047
CM	2018-08-01	31.1837	0	0	0	31.1837
CM	2018-08-01	24.9469	0	0	0	24.9469
CM	2018-08-01	31.8471	0	0	4.77707	36.6242
CM	2018-08-01	32.9087	0	0	0	32.9087
CM	2018-08-01	11.4119	0	0	0	11.4119
CM	2018-08-01	61.9692	46.8418	128.052	13.9331	250.796
CM	2018-08-01	79.087	44.3206	456.608	7.431	587.447
CM	2018-08-01	73.9119	0	57.5902	10.6157	142.118
CM	2018-08-01	67.9406	31.051	144.108	8.75796	251.858
CM	2018-08-01	78.1582	0	205.547	9.55414	293.259
CM	2018-08-01	16.3217	0	167.994	7.82909	192.144
CM	2018-08-01	47.7707	1.59236	284.899	17.7813	352.044
CM	2018-08-01	95.1433	5.17516	0	131.369	231.688
CM	2018-08-01	39.5435	0	98.9915	0	138.535
CM	2018-08-01	8.75796	0	8.22718	28.7951	45.7803
CM	2018-08-01	25.7431	0	7.03291	35.0318	67.8079
CM	2018-08-01	66.7463	0	0	42.4628	109.209
CM	2018-08-01	9.55414	2.38854	200.106	0	212.049
CM	2018-08-01	0	0	0	0	0
CM	2018-08-01	15.5255	0	25.0796	41.4013	82.0064
CM	2018-08-01	6.63482	12.8715	0	11.4119	30.9183
CM	2018-08-01	74.4427	0	11.2792	70.4618	156.184
CM	2018-09-01	66.3299	0	17.8637	6.14979	90.3434
CM	2018-09-01	70.5762	0	0	9.37111	79.9473
CM	2018-09-01	84.9257	0	0	13.1781	98.1038
CM	2018-09-01	36.7523	0	9.81038	30.1633	76.726
CM	2018-09-01	65.0121	136.906	#REF!	10.3961	212.314
CM	2018-09-01	138.077	0	0	9.95681	148.034
CM	2018-09-01	61.6443	70.869	0	31.9203	164.434
CM	2018-09-01	41.7307	23.7206	117.139	0	182.59
CM	2018-09-01	121.092	0	22.11	0	143.202
CM	2018-09-01	111.136	9.51753	330.917	8.93184	460.502
CM	2018-09-01	102.936	0	403.104	17.1316	523.172
CM	2018-09-01	103.961	15.8137	444.249	12.446	576.47
CM	2018-09-01	83.4615	44.8056	493.008	16.5459	637.821
CM	2018-09-01	89.4648	103.229	218.61	23.5742	434.878
CM	2018-09-01	76.8724	0	353.174	15.8137	445.86
CM	2018-09-01	56.8124	7.32118	353.613	22.4028	440.149
CM	2018-09-01	83.0222	0	393.001	8.49257	484.516
CM	2018-09-01	101.472	18.4494	286.405	14.7888	421.114
CM	2018-09-01	57.6909	0	0	0	57.6909
CM	2018-09-01	60.9122	0	0	0	60.9122
CM	2018-09-01	61.4979	0	0	10.2497	71.7476
CM	2018-09-01	76.4331	0	0	0	76.4331
CM	2018-09-01	28.2598	0	0	0	28.2598
CM	2018-09-01	89.0256	0	0	0	89.0256
CM	2018-09-01	42.4628	0	0	4.83198	47.2948
CM	2018-09-01	52.7125	0	0	0	52.7125
CM	2018-09-01	36.1666	0	0	0	36.1666
CM	2018-10-01	29.338	0	0	1.80145	31.1394
CM	2018-10-01	23.4189	0	0	4.50364	27.9225
CM	2018-10-01	34.7423	0	1.0294	1.93013	37.7019
CM	2018-10-01	12.9962	0	0	2.70218	15.6984
CM	2018-10-01	27.2792	0	0	0	27.2792
CM	2018-10-01	25.4777	0	0	13.5109	38.9886
CM	2018-10-01	38.0879	0	0	2.0588	40.1467
CM	2018-10-01	29.4666	0	0	0	29.4666
CM	2018-10-01	48.1246	0	0	3.08821	51.2128
CM	2018-10-01	53.2716	0	63.1796	10.8087	127.26
CM	2018-10-01	87.2418	25.4777	5.91906	9.00727	127.646
CM	2018-10-01	84.9257	0	90.9734	14.283	190.182
CM	2018-10-01	81.4515	10.294	68.3266	20.9741	181.046
CM	2018-10-01	102.168	0	54.301	11.1948	167.664
CM	2018-10-01	66.2678	5.01834	67.5545	33.0695	171.91
CM	2018-10-01	98.0506	0	13.1249	13.1249	124.3
CM	2018-10-01	94.0616	2.70218	0	16.0844	112.848
CM	2018-10-01	78.878	0	3.73158	9.908	92.5175
CM	2018-10-01	29.8527	0	0	0	29.8527
CM	2018-10-01	41.9481	0	0	0	41.9481
CM	2018-10-01	10.294	0	0	0	10.294
CM	2018-10-01	0	0	0	0	0
CM	2018-10-01	84.6683	0	0	0	84.6683
CM	2018-11-01	6.9356	0	0	0	6.9356
CM	2018-11-01	29.2994	0	0	0	29.2994
CM	2018-11-01	10.6157	0	0	1.55697	12.1727
CM	2018-11-01	0	0	0	0	0
CM	2018-11-01	9.908	0	0	0	9.908
CM	2018-11-01	13.7297	0	0	0	13.7297
CM	2018-11-01	13.1635	0	0	4.52937	17.6929
CM	2018-11-01	52.937	0	0	3.39703	56.334
CM	2018-11-01	87.615	0	0	1.41543	89.0304
CM	2018-11-01	0	0	0	0	0
CM	2018-11-01	113.093	0	0	2.40623	115.499
CM	2018-11-01	0	0	0	0	0
CM	2018-11-01	129.229	0	0	10.4742	139.703
CM	2018-11-01	193.489	0	0	1.27389	194.763
CM	2018-11-01	0	0	0	0	0
CM	2018-11-01	162.208	0	0	0.283086	162.491
CM	2018-11-01	129.087	0	0	0	129.087
CM	2019-01-01	3.19078	0	0	0.0970579	3.28784
CM	2019-01-01	0	0	0	0	0
CM	2019-01-01	3.73673	0	0	0.727934	4.46466
CM	2019-01-01	0	0	0	0	0
CM	2019-01-01	2.41432	0	0	0	2.41432
CM	2019-01-01	1.1283	0	0	0	1.1283
CM	2019-01-01	2.65696	0	0	0	2.65696
CM	2019-01-01	0.788596	0	0	0	0.788596
CM	2019-01-01	4.20989	0.0363967	0	0	4.24628
CM	2019-02-01	15.0253	0	0	0	15.0253
CM	2019-02-01	25.4777	0	0	5.2262	30.7039
CM	2019-02-01	24.8244	0	0	0	24.8244
CM	2019-02-01	8.98252	0	0	0	8.98252
CM	2019-02-01	0	0	0	19.4349	19.4349
CM	2019-02-01	8.49257	0	0	0	8.49257
CM	2019-02-01	25.9677	0	0	0	25.9677
CM	2019-02-01	13.0655	0	0	0	13.0655
CM	2019-02-01	14.6987	0	0	8.65589	23.3546
CM	2019-02-01	23.3546	11.5956	0	27.4375	62.3877
CM	2019-02-01	9.6358	0	106.974	0	116.61
CM	2019-02-01	59.448	0	114.813	33.9703	208.231
CM	2019-02-01	24.3345	0	0	19.1083	43.4428
CM	2019-02-01	22.048	0	43.6061	2.28646	67.9406
CM	2019-02-01	21.2314	0	62.0611	57.6515	140.944
CM	2019-02-01	24.9878	0	0	9.14584	34.1336
CM	2019-02-01	61.5711	0	106.157	0	167.728
CM	2019-02-01	50.4655	0	134.738	14.6987	199.902
CM	2019-02-01	22.048	0	66.4707	9.96244	98.4811
CM	2019-02-01	8.00261	0	28.4174	44.7493	81.1694
CM	2019-02-01	15.5153	7.0227	73.6567	0	96.1947
CM	2019-02-01	15.352	36.2567	55.855	2.93974	110.403
CM	2019-02-01	9.79912	7.0227	63.5309	5.87947	86.2322
CM	2019-02-01	6.69606	0	0	63.6943	70.3903
CM	2019-02-01	8.49257	0	48.9956	6.36943	63.8576
CM	2019-02-01	23.1912	21.0681	26.4576	0	70.717
CM	2019-02-01	13.2288	17.4751	42.9528	5.87947	79.5362
CM	2019-03-01	28.8747	0	0	0	28.8747
CM	2019-03-01	40.3397	0	0	3.68011	44.0198
CM	2019-03-01	9.34183	0	0	0	9.34183
CM	2019-03-01	29.0163	0	0	4.52937	33.5456
CM	2019-03-01	0	0	0	0	0
CM	2019-03-01	20.5237	0	0	0.9908	21.5145
CM	2019-03-01	37.5088	0	0	0	37.5088
CM	2019-03-01	30.8563	0	0	0	30.8563
CM	2019-03-01	57.4664	0	0	0	57.4664
CM	2019-03-01	39.9151	2.54777	67.5159	24.3454	134.324
CM	2019-03-01	0	9.62491	0	0	9.62491
CM	2019-03-01	58.1741	0	49.3984	14.4374	122.01
CM	2019-03-01	44.7275	0	38.6412	3.39703	86.7657
CM	2019-03-01	50.2477	0	25.1946	1.55697	76.9993
CM	2019-03-01	43.4536	0	37.5088	0	80.9625
CM	2019-03-01	41.189	0	19.5329	3.53857	64.2604
CM	2019-03-01	0	0	0	0	0
CM	2019-03-01	72.753	0	38.4996	13.1635	124.416
CM	2019-03-01	34.678	19.816	30.7148	0	85.2088
CM	2019-03-01	46.2845	2.54777	146.355	0	195.188
CM	2019-03-01	28.8747	0	129.37	4.81246	163.057
CM	2019-03-01	40.3397	0	55.0602	0	95.3999
CM	2019-03-01	36.6596	0	187.12	12.0311	235.81
CM	2019-03-01	47.6999	4.52937	69.356	34.2534	155.839
CM	2019-03-01	47.983	4.81246	72.3284	34.9611	160.085
CM	2019-03-01	27.4593	0	169.002	3.25548	199.717
CM	2019-03-01	32.6964	14.7205	30.7148	136.589	214.72
CM	2019-04-01	23.0824	0	0	0	23.0824
CM	2019-04-01	21.4492	0	0	0	21.4492
CM	2019-04-01	6.09723	0	0	0	6.09723
CM	2019-04-01	25.5866	0	0	0	25.5866
CM	2019-04-01	21.7758	0	0	0	21.7758
CM	2019-04-01	16.8763	0	0	0	16.8763
CM	2019-04-01	29.9417	0	0	0	29.9417
CM	2019-04-01	19.4894	0	0	0	19.4894
CM	2019-04-01	27.3287	0	0	0	27.3287
CM	2019-04-01	19.1627	0	16.6585	7.73042	43.5516
CM	2019-04-01	0	0	0	0	0
CM	2019-04-01	34.4058	0	0	0	34.4058
CM	2019-04-01	51.1732	3.26637	10.0169	6.20611	70.6625
CM	2019-04-01	0	0	0	0	0
CM	2019-04-01	21.0137	0	15.2431	5.2262	41.4829
CM	2019-04-01	9.908	0	0	3.04861	12.9566
CM	2019-04-01	48.669	13.501	0	11.6501	73.82
CM	2019-04-01	47.4713	0	0	9.03696	56.5082
CM	2019-04-01	32.7726	0	0	12.8477	45.6203
CM	2019-04-01	8.92809	0	58.1414	4.6818	71.7513
CM	2019-04-01	9.79912	0	0	0	9.79912
CM	2019-04-01	28.0908	0	0	0	28.0908
CM	2019-04-01	27.5464	0	0	7.94817	35.4946
CM	2019-04-01	7.2949	0	9.79912	7.51266	24.6067
CM	2019-04-01	3.37525	0	0	6.85938	10.2346
CM	2019-04-01	14.4809	0	0	6.31499	20.7959
CM	2019-04-01	9.79912	7.62154	0	10.8879	28.3086
CM	2019-05-01	64.2733	0	0	3.66725	67.9406
CM	2019-05-01	50.5694	0	0	3.08821	53.6576
CM	2019-05-01	45.5511	0	0	0	45.5511
CM	2019-05-01	20.2664	0	0	12.1598	32.4262
CM	2019-05-01	55.5877	0	0	0	55.5877
CM	2019-05-01	52.8855	0	0	11.3878	64.2733
CM	2019-05-01	60.7991	0	0	8.49257	69.2916
CM	2019-05-01	39.7607	0	0	0	39.7607
CM	2019-05-01	29.531	0	0	2.31616	31.8471
CM	2019-05-01	34.5493	0	0	12.3528	46.9021
CM	2019-05-01	16.4061	0	0	88.5929	104.999
CM	2019-05-01	29.338	0	0	15.441	44.779
CM	2019-05-01	0	26.0567	29.917	14.669	70.6427
CM	2019-05-01	30.8821	0	0	6.56244	37.4445
CM	2019-05-01	29.917	0	23.3546	3.08821	56.3598
CM	2019-05-01	6.94847	0	0	0	6.94847
CM	2019-05-01	26.8288	0	0	0	26.8288
CM	2019-05-01	19.3013	0	0	0	19.3013
CM	2019-05-01	20.8454	0	0	0	20.8454
CM	2019-05-01	10.0367	0	0	0	10.0367
CM	2019-05-01	17.3712	0	0	0	17.3712
CM	2019-05-01	23.1616	0	0	0	23.1616
CM	2019-05-01	20.0733	0	0	0	20.0733
CM	2019-05-01	14.862	0	0	0	14.862
CM	2019-05-01	20.8454	0	0	0	20.8454
CM	2019-05-01	18.5292	0	0	0	18.5292
CM	2019-05-01	34.1633	0	0	0	34.1633
CM	2019-06-01	10.6157	0	0	0	10.6157
CM	2019-06-01	0	0	0	4.09463	4.09463
CM	2019-06-01	10.6157	0	0	2.5781	13.1938
CM	2019-06-01	2.12314	0	0	0	2.12314
CM	2019-06-01	0	0	0	2.5781	2.5781
CM	2019-06-01	10.0091	0	0	0	10.0091
CM	2019-06-01	9.85745	0	0	0	9.85745
CM	2019-06-01	0	0	0	3.63967	3.63967
CM	2019-06-01	7.12769	0	0	0	7.12769
CM	2019-06-01	46.5627	0	0	14.7888	61.3515
CM	2019-06-01	0	0	0	0	0
CM	2019-06-01	9.66396	0	0	3.66059	13.3245
CM	2019-06-01	28.2598	0	0	1.46424	29.724
CM	2019-06-01	36.0202	0	0	22.4028	58.423
CM	2019-06-01	9.07826	0	0	8.63899	17.7173
CM	2019-06-01	27.0884	0	0	1.75708	28.8454
CM	2019-06-01	28.2598	0	0	9.07826	37.338
CM	2019-06-01	35.9418	31.8471	10.7674	4.39794	82.9542
CM	2019-06-01	36.0934	0	15.4686	5.1562	56.7182
CM	2019-06-01	0	0	0	0	0
CM	2019-06-01	17.4401	0	8.79588	0	26.236
CM	2019-06-01	32.7571	0	0	0	32.7571
CM	2019-06-01	0	0	0	0	0
CM	2019-06-01	14.5587	0	0	10.7674	25.3261
CM	2019-06-01	0	0	0	0	0
CM	2019-06-01	15.9236	0	157.416	5.30786	178.647
CM	2019-07-01	6.55141	0	17.1065	6.30877	29.9666
CM	2019-07-01	2.91174	0	0	0	2.91174
CM	2019-07-01	5.58083	0	0	0	5.58083
CM	2019-07-01	3.03306	0	0	0	3.03306
CM	2019-07-01	3.51835	0	0	0	3.51835
CM	2019-07-01	4.97422	0	0	0	4.97422
CM	2019-07-01	0	0	0	0	0
CM	2019-07-01	0.606612	0	0	0	0.606612
CM	2019-07-01	0	0	0	0	0
CM	2019-07-01	12.1322	0	6.06612	0	18.1984
CM	2019-07-01	8.97786	0	109.19	5.45951	123.628
CM	2019-07-01	12.4962	0	64.5435	0	77.0397
CM	2019-07-01	9.2205	0	81.65	0	90.8705
CM	2019-07-01	31.9078	0	231.968	25.2351	289.111
CM	2019-07-01	12.6175	0	166.212	0	178.829
CM	2019-07-01	46.1025	0	73.0361	7.0367	126.175
CM	2019-07-01	32.1504	0	246.77	0	278.92
CM	2019-07-01	55.323	0	104.459	7.40067	167.182
CM	2019-07-01	14.0734	0	415.529	24.9924	454.595
CM	2019-07-01	43.9187	0	0	0	43.9187
CM	2019-07-01	40.1577	0	150.44	0	190.598
CM	2019-07-01	10.1911	13.9521	0	0	24.1432
CM	2019-07-01	11.8896	1.45587	0	0	13.3455
CM	2019-07-01	8.49257	0	137.216	9.58447	155.293
CM	2019-07-01	12.6175	0	0	0	12.6175
CM	2019-07-01	5.33819	0	0	0	5.33819
CM	2019-07-01	11.647	0	0	0	11.647
SF	2018-08-01	16.8638	0	0	9.09918	25.963
SF	2018-08-01	16.6212	0	0	0	16.6212
SF	2018-08-01	5.09554	0	0	30.4519	35.5475
SF	2018-08-01	6.67273	0	0	12.4962	19.1689
SF	2018-08-01	10.4337	0	0	0	10.4337
SF	2018-08-01	13.5881	0	0	0	13.5881
SF	2018-08-01	22.0807	0	0	0	22.0807
SF	2018-08-01	23.4152	0	0	0	23.4152
SF	2018-08-01	0.970579	0	0	10.7977	11.7683
SF	2018-08-01	33.121	0	0	0	33.121
SF	2018-08-01	47.0731	0	0	20.5035	67.5766
SF	2018-08-01	13.1028	0	0	2.42645	15.5293
SF	2018-08-01	28.7534	0	0	3.27571	32.0291
SF	2018-08-01	31.0585	0	0	16.6212	47.6797
SF	2018-08-01	19.6542	0	0	20.9888	40.643
SF	2018-08-01	18.5623	3.27571	0	16.8638	38.7019
SF	2018-08-01	6.18744	0	0	49.9848	56.1723
SF	2018-08-01	28.5108	0	0	36.882	65.3928
SF	2018-08-01	8.73521	0	8.49257	0	17.2278
SF	2018-08-01	4.12496	0	9.34183	1.45587	14.9227
SF	2018-08-01	31.5438	0	0	0	31.5438
SF	2018-08-01	1.81984	0	3.76099	0	5.58083
SF	2018-08-01	2.42645	0	0	0	2.42645
SF	2018-08-01	4.12496	0	0	2.79042	6.91538
SF	2018-08-01	7.76463	0	2.66909	0.849257	11.283
SF	2018-08-01	12.7389	0	0	2.06248	14.8013
SF	2018-08-01	0.970579	0	4.24628	0	5.21686
SF	2018-09-01	32.0668	0	0	23.2814	55.3481
SF	2018-09-01	26.9419	0	0	0	26.9419
SF	2018-09-01	5.41767	0	0	9.37111	14.7888
SF	2018-09-01	27.8205	37.9237	0	0	65.7442
SF	2018-09-01	33.8239	0	0	0	33.8239
SF	2018-09-01	27.0884	0	0	0	27.0884
SF	2018-09-01	30.4561	6.44264	0	13.471	50.3697
SF	2018-09-01	30.6025	0	0	0	30.6025
SF	2018-09-01	42.7557	0	0	0	42.7557
SF	2018-09-01	16.5459	8.34615	0	0	24.892
SF	2018-09-01	18.5958	0	0	3.95344	22.5492
SF	2018-09-01	10.3961	0	24.7456	7.90687	43.0485
SF	2018-09-01	20.3529	0	0	22.2564	42.6093
SF	2018-09-01	11.421	0	0	6.88191	18.303
SF	2018-09-01	4.53913	0	0	17.278	21.8171
SF	2018-09-01	14.7888	0	0	6.29621	21.085
SF	2018-09-01	8.19972	0	0	39.8272	48.0269
SF	2018-09-01	13.9102	0	0	45.6842	59.5944
SF	2018-09-01	27.6741	79.508	0	5.27125	112.453
SF	2018-09-01	31.4811	0	0	0	31.4811
SF	2018-09-01	40.1201	0	2.78205	4.9784	47.8805
SF	2018-09-01	34.4095	0	2.78205	5.41767	42.6093
SF	2018-09-01	18.0101	0	0	0	18.0101
SF	2018-09-01	37.1916	0	0	0	37.1916
SF	2018-09-01	6.58906	0	0	1.75708	8.34615
SF	2018-09-01	10.1032	53.4446	0	2.92847	66.4763
SF	2018-09-01	37.1916	0	0	0	37.1916
SF	2018-10-01	28.8498	0	0	31.3476	60.1973
SF	2018-10-01	77.1825	0	0	0	77.1825
SF	2018-10-01	10.4908	0	0	7.99301	18.4838
SF	2018-10-01	57.8244	0	0	0	57.8244
SF	2018-10-01	79.8052	0	0	0	79.8052
SF	2018-10-01	27.3511	15.2367	0	30.848	73.4357
SF	2018-10-01	22.9799	26.6017	0	16.3607	65.9423
SF	2018-10-01	88.7973	0	0	0	88.7973
SF	2018-10-01	86.9239	7.86812	0	0	94.7921
SF	2018-10-01	71.5624	0	21.6061	37.9668	131.135
SF	2018-10-01	24.4786	6.49432	0	24.4786	55.4515
SF	2018-10-01	36.9677	0	0	6.61921	43.5869
SF	2018-10-01	27.1013	0	12.614	11.4899	51.2052
SF	2018-10-01	30.4733	11.1153	0	27.476	69.0646
SF	2018-10-01	56.0759	6.49432	0	0	62.5703
SF	2018-10-01	32.8463	0	0	41.9633	74.8095
SF	2018-10-01	10.1161	0	0	17.7345	27.8506
SF	2018-10-01	33.9703	0	0	40.0899	74.0602
SF	2018-10-01	47.958	0	0	0	47.958
SF	2018-10-01	36.7179	0	0	11.3651	48.0829
SF	2018-10-01	0	0	0	0	0
SF	2018-10-01	18.8585	0	0	0	18.8585
SF	2018-10-01	29.8489	0	0	0	29.8489
SF	2018-10-01	23.8541	0	0	18.234	42.0882
SF	2018-10-01	17.11	0	0	0	17.11
SF	2018-10-01	12.9886	0	0	6.61921	19.6078
SF	2018-10-01	23.3546	0	0	0	23.3546
SF	2018-11-01	0	0	0	0	0
SF	2018-11-01	60.2972	0	0	32.1302	92.4275
SF	2018-11-01	116.631	0	0	30.2902	146.921
SF	2018-11-01	25.4777	0	0	0	25.4777
SF	2018-11-01	102.76	0	0	27.7424	130.502
SF	2018-11-01	66.6667	0	0	36.518	103.185
SF	2018-11-01	118.754	13.1635	0	0	131.918
SF	2018-11-01	34.8195	0	0	0	34.8195
SF	2018-11-01	67.2328	0	0	0	67.2328
SF	2018-11-01	51.9462	1.27389	2.12314	17.4098	72.753
SF	2018-11-01	53.2201	16.9851	0	0	70.2052
SF	2018-11-01	92.4275	0	0	5.23708	97.6645
SF	2018-11-01	54.2109	17.4098	0	2.40623	74.0269
SF	2018-11-01	27.0347	0	0	0	27.0347
SF	2018-11-01	96.8153	0	0	0	96.8153
SF	2018-11-01	63.2696	0	0	4.52937	67.799
SF	2018-11-01	53.6447	0	0	12.7389	66.3836
SF	2018-11-01	36.0934	0	0	0	36.0934
SF	2018-11-01	16.2774	0	0	1.27389	17.5513
SF	2018-11-01	15.9943	0	0	18.259	34.2534
SF	2018-11-01	27.4593	0	0	1.13234	28.5916
SF	2018-11-01	9.48337	0	0	3.39703	12.8804
SF	2018-11-01	15.0035	0	0	0	15.0035
SF	2018-11-01	37.2258	0	0	0	37.2258
SF	2018-11-01	30.0071	0	0	0	30.0071
SF	2018-11-01	23.3546	0	0	4.954	28.3086
SF	2018-12-01	83.6675	0	0	0	83.6675
SF	2018-12-01	24.8486	0	0	3.77448	28.6231
SF	2018-12-01	30.5103	0	0	0	30.5103
SF	2018-12-01	48.2818	0	0	5.03263	53.3145
SF	2018-12-01	47.6527	0	0	0	47.6527
SF	2018-12-01	30.6676	4.40355	0	10.6943	45.7655
SF	2018-12-01	25.1632	0	0	0	25.1632
SF	2018-12-01	53.4717	0	0	3.45994	56.9317
SF	2018-12-01	52.9999	0	0	0	52.9999
SF	2018-12-01	16.0415	201.148	0	13.0534	230.243
SF	2018-12-01	20.2878	0	0	0	20.2878
SF	2018-12-01	11.0089	0	0	1.5727	12.5816
SF	2018-12-01	33.813	0	0	14.1543	47.9673
SF	2018-12-01	33.3412	35.2284	1.72997	15.8842	86.1838
SF	2018-12-01	87.5993	0	0	5.34717	92.9464
SF	2018-12-01	38.2166	2.51632	0	9.75073	50.4836
SF	2018-12-01	44.5074	0	0	13.2107	57.718
SF	2018-12-01	57.718	0	0	0	57.718
SF	2018-12-01	7.07714	0	0	0	7.07714
SF	2018-12-01	13.6825	0	0	0	13.6825
SF	2018-12-01	17.7715	0	0	0	17.7715
SF	2018-12-01	75.6468	0	0	0	75.6468
SF	2018-12-01	29.0949	0	0	4.08901	33.1839
SF	2018-12-01	86.0266	0	0	0	86.0266
SF	2018-12-01	21.8605	0	0	0	21.8605
SF	2018-12-01	9.59346	0	0	0	9.59346
SF	2018-12-01	15.2552	0	0	0	15.2552
SF	2019-01-01	9.09918	0	0	6.30877	15.4079
SF	2019-01-01	28.9961	0	0	0	28.9961
SF	2019-01-01	25.1137	0	0	5.09554	30.2093
SF	2019-01-01	19.7756	0	0	9.70579	29.4813
SF	2019-01-01	31.1799	0	0	0	31.1799
SF	2019-01-01	33.121	0	0	5.70215	38.8232
SF	2019-01-01	50.5914	6.79406	0	6.79406	64.1796
SF	2019-01-01	34.8195	0	0	0	34.8195
SF	2019-01-01	36.7607	2.66909	0	0	39.4298
SF	2019-01-01	41.1283	0	0	34.0916	75.2199
SF	2019-01-01	88.6867	0	0	19.5329	108.22
SF	2019-01-01	65.8781	11.7683	2.1838	50.5914	130.422
SF	2019-01-01	76.7971	0	0	28.0255	104.823
SF	2019-01-01	40.4004	0	0	40.1577	80.5581
SF	2019-01-01	97.9072	0	0	23.4152	121.322
SF	2019-01-01	46.9518	6.55141	0	35.9114	89.4146
SF	2019-01-01	70.2457	8.85654	0	34.9409	114.043
SF	2019-01-01	57.5068	0	0	33.2423	90.7492
SF	2019-01-01	18.9263	0.727934	0	2.42645	22.0807
SF	2019-01-01	12.4962	0	0	2.79042	15.2866
SF	2019-01-01	9.94844	0	0	4.61025	14.5587
SF	2019-01-01	22.6873	3.03306	0.606612	4.36761	30.6946
SF	2019-01-01	13.3455	0	0	2.79042	16.1359
SF	2019-01-01	27.7828	0	0	0	27.7828
SF	2019-01-01	20.2608	13.3455	0.48529	1.0919	35.1835
SF	2019-01-01	8.37125	0	0	2.79042	11.1617
SF	2019-01-01	14.4374	0	0	10.0698	24.5071
SF	2019-02-01	12.7389	0	0	4.24628	16.9851
SF	2019-02-01	38.0649	0	32.6054	0	70.6703
SF	2019-02-01	55.6567	0	0	4.24628	59.9029
SF	2019-02-01	34.7285	0	0	7.7343	42.4628
SF	2019-02-01	46.2542	0	0	10.3124	56.5666
SF	2019-02-01	15.6203	0	0	14.5587	30.179
SF	2019-02-01	26.5393	0	0	9.55414	36.0934
SF	2019-02-01	13.0422	0	0	12.2839	25.3261
SF	2019-02-01	39.7331	0	0	8.18926	47.9224
SF	2019-02-01	50.6521	0	0	88.4137	139.066
SF	2019-02-01	15.1653	81.5893	0	38.0649	134.82
SF	2019-02-01	31.5438	0	0	79.7695	111.313
SF	2019-02-01	42.6145	0	0	43.0695	85.684
SF	2019-02-01	85.3806	1.81984	0	0	87.2005
SF	2019-02-01	49.2872	0	0	107.977	157.264
SF	2019-02-01	122.081	1.97149	0	30.3306	154.383
SF	2019-02-01	57.6281	0	0	33.3637	90.9918
SF	2019-02-01	47.4674	0	0	36.8517	84.3191
SF	2019-02-01	31.6955	0	0	0	31.6955
SF	2019-02-01	32.6054	0	0	5.00455	37.6099
SF	2019-02-01	24.1128	0	0	6.06612	30.179
SF	2019-02-01	5.91447	0	0	1.36488	7.27934
SF	2019-02-01	3.18471	3.63967	0	7.88596	14.7103
SF	2019-02-01	27.9042	101.001	0	8.49257	137.398
SF	2019-02-01	4.54959	0	0	0	4.54959
SF	2019-02-01	7.431	0	0	5.1562	12.5872
SF	2019-02-01	24.2645	0	0	0	24.2645
SF	2019-03-01	21.9897	0	0	0	21.9897
SF	2019-03-01	21.2314	0	0	22.5963	43.8277
SF	2019-03-01	28.6624	0	0	8.79588	37.4583
SF	2019-03-01	31.8471	0	0	15.0136	46.8608
SF	2019-03-01	31.8471	0	0	0	31.8471
SF	2019-03-01	13.1938	0	0	0	13.1938
SF	2019-03-01	22.748	0	0	13.6488	36.3967
SF	2019-03-01	44.586	0	0	0	44.586
SF	2019-03-01	43.0695	0	0	0	43.0695
SF	2019-03-01	85.3806	1.51653	0	23.9612	110.858
SF	2019-03-01	58.0831	0	0	18.0467	76.1298
SF	2019-03-01	42.6145	0	0	32.4537	75.0682
SF	2019-03-01	21.9897	102.214	0	4.54959	128.753
SF	2019-03-01	33.5153	0	0	23.6579	57.1732
SF	2019-03-01	89.6269	1.81984	0	35.6385	127.085
SF	2019-03-01	50.0455	0	0	15.1653	65.2108
SF	2019-03-01	14.2554	9.70579	0	30.179	54.1401
SF	2019-03-01	39.7331	0	0	23.0513	62.7843
SF	2019-03-01	31.2405	0	6.52108	0	37.7616
SF	2019-03-01	36.0934	0	0	0	36.0934
SF	2019-03-01	36.0934	0	0	0	31.9988
SF	2019-03-01	37.7616	0	0	0	37.7616
SF	2019-03-01	26.8426	0	1.21322	1.66818	29.724
SF	2019-03-01	31.9988	0	0	0	31.9988
SF	2019-03-01	13.4971	0	0	0	13.4971
SF	2019-03-01	9.85745	0	0	0	9.85745
SF	2019-03-01	19.5632	0	0	0	19.5632
SF	2019-04-01	9.00727	0	0	3.73158	12.7389
SF	2019-04-01	23.1616	0	0	23.1616	46.3231
SF	2019-04-01	0	0	0	0	0
SF	2019-04-01	18.9153	0	0	10.5514	29.4666
SF	2019-04-01	34.9997	0	30.3674	7.33449	72.7015
SF	2019-04-01	41.3048	5.01834	0	0	46.3231
SF	2019-04-01	18.5292	0	0	0	18.5292
SF	2019-04-01	31.0107	0	0	0	31.0107
SF	2019-04-01	30.8821	0	0	0	30.8821
SF	2019-04-01	26.3784	0	0	17.2425	43.6209
SF	2019-04-01	24.3196	0	0	2.44483	26.7645
SF	2019-04-01	12.7389	0	0	17.4998	30.2387
SF	2019-04-01	31.0107	0	0	9.00727	40.018
SF	2019-04-01	15.5697	8.49257	0	11.1948	35.257
SF	2019-04-01	32.4262	0	0	16.4704	48.8966
SF	2019-04-01	24.0623	25.7351	0	32.0401	81.8375
SF	2019-04-01	27.2792	8.87859	0	16.4704	52.6282
SF	2019-04-01	36.1578	0	0	6.94847	43.1062
SF	2019-04-01	30.2387	4.76099	0	1.41543	36.4151
SF	2019-04-01	7.20582	0	0	0	7.20582
SF	2019-04-01	11.3234	0	0	37.0585	48.3819
SF	2019-04-01	7.97787	0	0	4.63231	12.6102
SF	2019-04-01	8.36389	0	0	7.20582	15.5697
SF	2019-04-01	7.72052	0.643376	0	0	8.36389
SF	2019-04-01	1.28675	0	0	0	1.28675
SF	2019-04-01	10.0367	0	0	4.24628	14.283
SF	2019-04-01	6.94847	0	0	1.0294	7.97787
SF	2019-05-01	5.52017	0	13.305	3.39703	22.2222
SF	2019-05-01	26.1854	8.63411	0	0	34.8195
SF	2019-05-01	16.9851	0	0	0	16.9851
SF	2019-05-01	18.1175	0	0	14.862	32.9795
SF	2019-05-01	30.5732	0	0	5.23708	35.8103
SF	2019-05-01	41.3305	0	0	4.24628	45.5768
SF	2019-05-01	25.4777	0	0	10.8988	36.3765
SF	2019-05-01	25.0531	0	0	0	25.0531
SF	2019-05-01	29.8655	0	0	0	29.8655
SF	2019-05-01	14.0127	0	0	0	14.0127
SF	2019-05-01	25.9023	0	0	16.419	42.3213
SF	2019-05-01	30.9979	14.2958	0	14.7205	60.0142
SF	2019-05-01	10.4742	4.10474	0	15.4282	30.0071
SF	2019-05-01	12.4558	6.9356	0	4.81246	24.2038
SF	2019-05-01	7.78485	0	0	14.2958	22.0807
SF	2019-05-01	7.50177	0	0	20.6653	28.167
SF	2019-05-01	14.7205	0	0	8.06794	22.7884
SF	2019-05-01	24.4869	0	0	12.0311	36.518
SF	2019-05-01	8.35103	0	0	0	8.35103
SF	2019-05-01	14.1543	9.48337	0	1.55697	25.1946
SF	2019-05-01	14.0127	0	0	0	14.0127
SF	2019-05-01	0	0	0	4.38783	4.38783
SF	2019-05-01	2.40623	0	0	5.23708	7.64331
SF	2019-05-01	8.35103	0	0	0	8.35103
SF	2019-05-01	0	0	0	3.39703	3.39703
SF	2019-05-01	6.08634	0	0	0	6.08634
SF	2019-05-01	3.45364	0	0	0	3.45364
SF	2019-06-01	35.0318	0	0	11.6773	46.7091
SF	2019-06-01	40.0364	0	0	0	40.0364
SF	2019-06-01	27.2975	0	0	0	27.2975
SF	2019-06-01	43.3728	0	0	0	43.3728
SF	2019-06-01	35.7901	0	0	0	35.7901
SF	2019-06-01	31.8471	0	0	0	31.8471
SF	2019-06-01	22.4446	0	0	0	22.4446
SF	2019-06-01	34.2736	0	0	0	34.2736
SF	2019-06-01	14.862	15.317	0	0	30.179
SF	2019-06-01	51.1071	0	0	22.293	73.4001
SF	2019-06-01	30.6339	0	0	24.1128	54.7467
SF	2019-06-01	24.8711	0	0	11.374	36.2451
SF	2019-06-01	43.6761	0	0	3.18471	46.8608
SF	2019-06-01	71.4286	16.2269	0	11.374	99.0294
SF	2019-06-01	40.9463	0	0	8.18926	49.1356
SF	2019-06-01	52.9269	0	0	37.7616	90.6885
SF	2019-06-01	20.0182	0	0	31.3922	51.4104
SF	2019-06-01	19.5632	48.074	0	21.6864	89.3236
SF	2019-06-01	7.58265	0	0	7.58265	15.1653
SF	2019-06-01	10.919	0	0	2.12314	13.0422
SF	2019-06-01	3.33637	0	0	1.97149	5.30786
SF	2019-06-01	0	0	0	0	0
SF	2019-06-01	5.91447	21.6864	0	0	27.6008
SF	2019-06-01	18.805	0	0	7.7343	26.5393
SF	2019-06-01	15.317	0	0	0	15.317
SF	2019-06-01	0	0	0	2.88141	2.88141
SF	2019-06-01	14.2554	0	0	5.76281	20.0182
SF	2019-07-01	28.0512	0	0	6.56244	34.6137
SF	2019-07-01	19.816	0	0	24.191	44.0069
SF	2019-07-01	0	0	0	0	0
SF	2019-07-01	10.5514	0	0	3.47423	14.0256
SF	2019-07-01	16.8565	0	0	0	16.8565
SF	2019-07-01	0	0	0	0	0
SF	2019-07-01	0	0	0	0	0
SF	2019-07-01	11.4521	10.0367	0	0	21.4888
SF	2019-07-01	25.7351	0	0	0	25.7351
SF	2019-07-01	27.0218	8.36389	0	28.5659	63.9516
SF	2019-07-01	28.6946	0	0	28.0512	56.7458
SF	2019-07-01	0	0	0	0	0
SF	2019-07-01	0	0	0	0	0
SF	2019-07-01	12.7389	0	7.20582	44.1356	64.0803
SF	2019-07-01	25.349	0	18.9153	25.0917	69.356
SF	2019-07-01	7.59184	0	6.43376	34.9997	49.0253
SF	2019-07-01	25.9924	5.66171	3.98893	81.7088	117.352
SF	2019-07-01	0	0	0	0	0
SF	2019-07-01	0	0	0	0	0
SF	2019-07-01	3.34556	0	4.88966	0	8.23522
SF	2019-07-01	9.908	0	0	5.53304	15.441
SF	2019-07-01	19.3013	0	0	2.95953	22.2608
SF	2019-07-01	17.3712	0	0	4.24628	21.6174
SF	2019-07-01	0	0	0	0	0
SF	2019-07-01	6.69111	0	0	0	6.69111
SF	2019-07-01	6.04774	0	0	4.11761	10.1653
SF	2019-07-01	0	0	0	0	0
AC	2018-08-01	0	0	0	0	0
AC	2018-08-01	28.8747	0	0	5.21686	34.0916
AC	2018-08-01	61.7531	0	0	11.0403	72.7934
AC	2018-08-01	66.8487	21.3527	0	37.1247	125.326
AC	2018-08-01	62.1171	0	0	0	62.1171
AC	2018-08-01	73.764	9.2205	0	26.0843	109.069
AC	2018-08-01	2.54777	0	0	0	2.54777
AC	2018-08-01	26.2056	0	10.919	0	37.1247
AC	2018-08-01	17.3491	0	3.63967	5.82348	26.8123
AC	2018-08-01	24.2645	20.6248	0	21.2314	66.1207
AC	2018-08-01	49.9848	0	3.03306	11.283	64.3009
AC	2018-08-01	26.6909	0	0	6.67273	33.3637
AC	2018-08-01	18.1984	0	4.36761	18.077	40.643
AC	2018-08-01	46.9518	25.7204	2.42645	0	75.0986
AC	2018-08-01	52.7753	0	0	10.0698	62.845
AC	2018-09-01	50.9554	0	0	6.51097	57.4664
AC	2018-09-01	35.8103	0	0	0	35.8103
AC	2018-09-01	80.2548	0	0	55.3432	135.598
AC	2018-09-01	58.7403	14.0127	5.80326	2.83086	81.3871
AC	2018-09-01	67.0913	51.097	3.11394	20.8068	142.109
AC	2018-09-01	82.0948	0	0	4.52937	86.6242
AC	2018-09-01	34.5364	0	0	12.0311	46.5676
AC	2018-09-01	0	0	0	0	0
AC	2018-09-01	27.7424	0	0	13.7297	41.472
AC	2018-09-01	45.7183	21.7976	0	4.81246	72.3284
AC	2018-09-01	27.4593	24.0623	1.13234	5.09554	57.7495
AC	2018-09-01	40.4812	0	0	3.82166	44.3029
AC	2018-09-01	72.0453	0	0	12.8804	84.9257
AC	2018-09-01	42.6044	0	0	10.8988	53.5032
AC	2018-09-01	41.472	0	0	0	41.472
AC	2018-10-01	41.9481	74.3743	38.0879	23.0329	177.443
AC	2018-10-01	66.7825	0	0	0	66.7825
AC	2018-10-01	58.8046	0	0	4.63231	63.4369
AC	2018-10-01	34.3563	26.3784	134.723	29.724	225.182
AC	2018-10-01	96.1204	1.5441	10.9374	4.76099	113.363
AC	2018-10-01	119.668	0	11.4521	4.50364	135.624
AC	2018-10-01	82.8669	0	0	5.27569	88.1426
AC	2018-10-01	95.9918	0	0	21.2314	117.223
AC	2018-10-01	31.7828	0	0	23.2902	55.073
AC	2018-10-01	36.1578	24.7057	0	9.26462	70.128
AC	2018-10-01	36.6725	42.7202	0	48.7679	128.161
AC	2018-10-01	35.1284	37.3158	0	21.3601	93.8043
AC	2018-10-01	101.782	0	0	31.0107	132.793
AC	2018-10-01	48.5106	0	0	19.0439	67.5545
AC	2018-10-01	96.5065	0	0	6.56244	103.069
AC	2018-11-01	29.4311	41.145	0	9.81038	9.81038
AC	2018-11-01	44.952	0	31.9203	7.02833	7.02833
AC	2018-11-01	32.2132	0	0	1.75708	1.75708
AC	2018-11-01	66.4763	0	0	2.63562	69.1119
AC	2018-11-01	32.506	0	0	7.02833	39.5344
AC	2018-11-01	31.4811	0	0	36.1666	67.6477
AC	2018-11-01	60.7658	0	3.36774	28.4062	92.5397
AC	2018-11-01	64.7192	2.19635	13.3245	2.92847	83.1686
AC	2018-11-01	4.53913	0	2.63562	3.66059	10.8353
AC	2018-11-01	30.8954	0	12.5924	8.19972	51.6875
AC	2018-11-01	63.5478	0	24.1599	6.88191	94.5896
AC	2018-11-01	57.6909	1.61066	2.78205	9.81038	71.894
AC	2018-11-01	45.0985	0	27.9669	16.3994	89.4648
AC	2018-11-01	75.8474	0	19.7672	17.278	112.893
AC	2018-11-01	15.3745	0	1.02497	3.66059	20.06
AC	2018-12-01	46.0722	8.1741	12.6327	26.9639	93.8429
AC	2018-12-01	67.6221	5.09554	0	26.7516	99.4692
AC	2018-12-01	75.9023	0	0	5.83864	81.741
AC	2018-12-01	34.5011	0	0	42.3567	76.8577
AC	2018-12-01	65.9236	85.8811	0	14.2251	166.03
AC	2018-12-01	20.8068	0	0	5.30786	26.1146
AC	2018-12-01	186.73	2.54777	0	19.1083	208.386
AC	2018-12-01	176.539	1.16773	0.106157	13.6943	191.507
AC	2018-12-01	186.518	0	0	9.44798	195.966
AC	2018-12-01	200.212	0	0	0	200.212
AC	2018-12-01	287.367	0	0	16.0297	303.397
AC	2018-12-01	107.856	0	7.32484	7.85563	123.036
AC	2018-12-01	167.941	6.79406	3.39703	16.1359	194.268
AC	2018-12-01	191.295	0	0.7431	12.9512	204.989
AC	2018-12-01	241.932	0	0	12.3142	254.246
AC	2019-01-01	51.9804	0	0	17.278	69.2584
AC	2019-01-01	124.899	0	12.2996	41.4379	178.637
AC	2019-01-01	76.8724	0	0	0	76.8724
AC	2019-01-01	9.81038	0	8.63899	4.39271	22.8421
AC	2019-01-01	14.6424	0	0	0	14.6424
AC	2019-01-01	17.1316	0	0	0	17.1316
AC	2019-01-01	27.9669	0	0	6.44264	34.4095
AC	2019-01-01	42.4628	0	10.5425	13.6174	66.6227
AC	2019-01-01	145.691	0	0	6.44264	152.134
AC	2019-01-01	23.1349	0	15.2281	34.1167	72.4797
AC	2019-01-01	44.6592	6.14979	22.11	16.8387	89.7577
AC	2019-01-01	33.6774	0	0	7.76045	41.4379
AC	2019-01-01	86.3899	10.8353	39.0951	0	136.32
AC	2019-01-01	25.3313	0	20.3529	12.446	58.1302
AC	2019-01-01	22.4028	0	2.63562	7.90687	32.9453
AC	2019-02-01	97.5181	8.34615	103.229	55.7874	264.88
AC	2019-02-01	162.091	43.195	306.318	8.93184	520.536
AC	2019-02-01	209.093	4.53913	58.5694	13.471	285.672
AC	2019-02-01	218.757	19.1815	0	20.2065	258.145
AC	2019-02-01	250.97	0	0	6.29621	257.266
AC	2019-02-01	276.301	26.2098	0	31.9203	334.432
AC	2019-02-01	39.3879	4.39271	0	0	43.7807
AC	2019-02-01	18.8886	3.36774	0	0	22.2564
AC	2019-02-01	51.2483	26.3562	0	18.303	95.9075
AC	2019-02-01	73.7975	7.32118	0	8.49257	89.6112
AC	2019-02-01	60.9122	3.66059	6.73549	15.2281	86.5363
AC	2019-02-01	91.5148	0	0	9.66396	101.179
AC	2019-02-01	27.3812	0	16.5459	9.07826	53.0053
AC	2019-02-01	107.329	0	0	6.14979	113.478
AC	2019-02-01	84.0471	0	0	11.8603	95.9075
AC	2019-03-01	33.121	0	3.15438	11.7683	48.0437
AC	2019-03-01	82.3779	0	6.06612	16.1359	104.58
AC	2019-03-01	131.999	0	8.73521	30.088	170.822
AC	2019-03-01	22.566	2.91174	1.21322	2.66909	29.36
AC	2019-03-01	45.0106	0	0	4.12496	49.1356
AC	2019-03-01	56.4149	6.91538	0	6.06612	69.3964
AC	2019-03-01	15.6506	0	0	10.919	26.5696
AC	2019-03-01	6.55141	3.63967	0	7.0367	17.2278
AC	2019-03-01	30.5732	20.8675	3.76099	21.7167	76.9184
AC	2019-03-01	6.18744	0	3.88232	7.64331	17.7131
AC	2019-03-01	11.5256	0	0	15.7719	27.2975
AC	2019-03-01	22.566	0	0	12.0109	34.5769
AC	2019-03-01	12.1322	0	0	8.24992	20.3822
AC	2019-03-01	30.9372	0	0	4.24628	35.1835
AC	2019-04-01	0	0	0	0	0
AC	2019-04-01	21.9542	0	0	4.78836	26.7426
AC	2019-04-01	12.9195	0	0	9.39603	22.3156
AC	2019-04-01	19.3341	0	0	10.6609	29.995
AC	2019-04-01	31.3502	7.7698	0	0	39.12
AC	2019-04-01	10.7512	0	0	12.3775	23.1287
AC	2019-04-01	30.0854	41.5594	0	13.4616	85.1064
AC	2019-04-01	3.97525	4.78836	0	2.71039	11.474
AC	2019-04-01	5.2401	0	0	3.43317	8.67326
AC	2019-04-01	23.9418	0	0	21.5928	45.5346
AC	2019-04-01	48.3354	0	0	8.40222	56.7376
AC	2019-04-01	12.8292	0	0	6.32425	19.1535
AC	2019-04-01	16.6238	6.32425	0	11.2933	34.2413
AC	2019-04-01	22.948	0	0	9.84777	32.7958
AC	2019-04-01	11.9257	0	0	10.5705	22.4963
AC	2019-06-01	20.3822	0	0	15.5697	35.9519
AC	2019-06-01	79.5471	0	0	9.20028	88.7473
AC	2019-06-01	43.5952	0	0	3.82166	47.4168
AC	2019-06-01	12.8804	0	0	0	12.8804
AC	2019-06-01	14.1543	0	0	0	14.1543
AC	2019-06-01	12.5973	0	0	4.954	17.5513
AC	2019-06-01	12.1727	0	0	14.2958	26.4685
AC	2019-06-01	0	0	4.10474	0	4.10474
AC	2019-06-01	10.4742	14.862	7.36023	0	32.6964
AC	2019-06-01	41.0474	0	0	48.9738	90.0212
AC	2019-06-01	4.24628	3.68011	13.5881	0	21.5145
AC	2019-06-01	23.9207	0	0	0.707714	24.6285
AC	2019-06-01	17.6929	0	55.9094	0	73.6023
AC	2019-06-01	17.2682	0	0	31.8471	49.1154
AC	2019-06-01	13.1635	0	0	3.11394	16.2774
AC	2019-07-01	57.0418	0	0	40.4812	97.523
AC	2019-07-01	67.2328	4.954	0	17.2682	89.4551
AC	2019-07-01	68.5067	0	0	0	68.5067
AC	2019-07-01	24.9115	0	0	0	24.9115
AC	2019-07-01	14.4374	34.9611	0	9.05874	58.4572
AC	2019-07-01	0	28.3086	0	0	28.3086
AC	2019-07-01	44.0198	0	0	4.954	48.9738
AC	2019-07-01	8.77565	0	0	8.49257	17.2682
AC	2019-07-01	7.07714	0	0	2.9724	10.0495
AC	2019-07-01	9.62491	59.5895	0	17.4098	86.6242
AC	2019-07-01	3.25548	0	0	8.06794	11.3234
AC	2019-07-01	10.0495	0	0	10.6157	20.6653
AC	2019-07-01	0	5.9448	0	11.7481	17.6929
AC	2019-07-01	9.20028	0	0	15.2866	24.4869
AC	2019-07-01	34.1118	0	0	0	34.1118

## Sheet: BS
AREA	DATE	LEAF (g/m2)	BRANCHES (g/m2)	REPRODUCTIVE MATERIAL (g/m2)	MISCELLANEOUS (g/m2)	SUM (g/m2)
MC	2018-08-01	7.8125	0	0	0	7.8125
MC	2018-08-01	4.79167	18.2292	0	1.04167	24.0625
MC	2018-08-01	4.6875	0	0	14.2708	18.9583
MC	2018-08-01	0	0	0	0	0
MC	2018-08-01	0	0	0	0	0
MC	2018-09-01	31.6092	0	0	11.0345	42.6437
MC	2018-09-01	11.1494	0	0	0	11.1494
MC	2018-09-01	114.713	9.65517	148.851	89.3103	362.529
MC	2018-09-01	25.7471	0	3.44828	0	29.1954
MC	2018-09-01	81.7241	26.6667	5.05747	0	113.448
MC	2018-10-01	46.2626	3.93939	0	25.5556	75.7576
MC	2018-10-01	23.7374	0	0	29.1919	52.9293
MC	2018-10-01	85.3535	0	73.5354	16.2626	175.152
MC	2018-10-01	199.495	10.6061	85.9596	14.6465	310.707
MC	2018-10-01	154.949	0	289.394	12.4242	456.768
MC	2018-11-01	17.619	0	0	13.0476	30.6667
MC	2018-11-01	1.42857	0	0	7.42857	8.85714
MC	2018-11-01	20.2857	2.38095	32.5714	6.95238	62.1905
MC	2018-11-01	33.9048	1.42857	92.1905	0	127.524
MC	2018-11-01	4	0	7.52381	0	11.5238
MC	2019-01-01	17.619	0	0	13.0476	30.6667
MC	2019-01-01	1.42857	0	0	7.42857	8.85714
MC	2019-01-01	20.2857	2.38095	32.5714	6.95238	62.1905
MC	2019-01-01	33.9048	1.42857	92.1905	0	127.524
MC	2019-01-01	4	0	7.52381	0	11.5238
MC	2019-02-01	5.76923	0	0	4.87179	10.641
MC	2019-02-01	40.7692	0	0	3.84615	44.6154
MC	2019-02-01	33.8462	16.9231	28.5897	29.7436	109.103
MC	2019-02-01	100.385	0	49.4872	14.7436	164.615
MC	2019-02-01	34.7436	0	43.9744	5.38462	84.1026
MC	2019-03-01	90.5556	3	0	8.66667	102.222
MC	2019-03-01	240.111	7.22222	0	14.8889	262.222
MC	2019-03-01	266.889	12.4444	54.1111	29.7778	363.222
MC	2019-03-01	50	0	16.7778	11.5556	78.3333
MC	2019-03-01	210.444	19.5556	0	95.4444	325.444
MC	2019-04-01	27.6923	0	0	0	27.6923
MC	2019-04-01	115.385	0	0	2.64957	118.034
MC	2019-04-01	114.872	5.12821	0	55.3846	175.385
MC	2019-04-01	96.7521	24.6154	0	12.735	134.103
MC	2019-04-01	120.94	0	0	49.5726	170.513
MC	2019-05-01	265	29.5455	0	36.0606	330.606
MC	2019-05-01	43.6364	0	0	15.1515	58.7879
MC	2019-05-01	123.03	95.1515	19.0909	58.7879	296.061
MC	2019-05-01	101.818	0	14.0909	17.5758	133.485
MC	2019-05-01	166.212	0	64.8485	58.0303	289.091
MC	2019-06-01	169.643	0	29.5238	0	199.167
MC	2019-06-01	168.333	46.6667	78.5714	46.6667	340.238
MC	2019-06-01	422.262	0	29.0476	0	451.31
MC	2019-06-01	62.9762	0	79.5238	0	142.5
MC	2019-06-01	158.571	52.619	55.9524	52.619	319.762
MC	2019-07-01	11.5238	0	0	8.09524	19.619
MC	2019-07-01	11.1429	0	0	0	11.1429
MC	2019-07-01	97.7143	65.7143	0	395.429	558.857
MC	2019-07-01	10.2857	11.619	31.9048	0	53.8095
MC	2019-07-01	12.381	0	0	0	12.381
SF	2018-08-01	42.5714	112.952	0	106.571	262.095
SF	2018-08-01	94.9524	76	0	116.19	287.143
SF	2018-08-01	192.286	28.6667	0	230.571	451.524
SF	2018-08-01	5.90476	20.8571	76.381	28.4762	131.619
SF	2018-08-01	35.0476	27.7143	0	15.2381	78
SF	2018-09-01	145.862	23.4483	0	153.218	322.529
SF	2018-09-01	112.989	80	0	87.4713	280.46
SF	2018-09-01	198.966	85.1724	0	197.356	481.494
SF	2018-09-01	240.69	174.368	0	51.7241	466.782
SF	2018-09-01	46.8966	6.66667	0	12.8736	66.4368
SF	2018-10-01	32.9412	88.1373	38.4314	46.6667	206.176
SF	2018-10-01	84.4118	106.961	67.451	639.314	898.137
SF	2018-10-01	153.235	19.8039	0	158.333	331.373
SF	2018-10-01	10.7843	0	5.4902	11.3725	27.6471
SF	2018-10-01	33.4314	7.2549	0	0	40.6863
SF	2018-11-01	166.667	51.7778	43.8889	158.444	420.778
SF	2018-11-01	57.8889	31.6667	15.8889	212.778	318.222
SF	2018-11-01	131.778	199.889	0	894.444	1226.11
SF	2018-11-01	7	0	0	164.111	171.111
SF	2018-11-01	42.1111	0	0	38.5556	80.6667
SF	2018-12-01	129.506	114.568	0	382.716	626.79
SF	2018-12-01	183.704	0	0	275.556	459.259
SF	2018-12-01	173.086	431.111	13.4568	1432.35	2050
SF	2018-12-01	249.506	148.395	0	303.58	701.481
SF	2018-12-01	83.3333	0	0	19.5062	102.84
SF	2019-01-01	186.476	109.143	0	258.952	554.571
SF	2019-01-01	103.905	277.333	20.1905	259.238	660.667
SF	2019-01-01	126.952	214.762	6.28571	582.286	930.286
SF	2019-01-01	97.2381	64.6667	0	547.143	709.048
SF	2019-01-01	81.619	23.8095	0	0	105.429
SF	2019-01-01	65.7429	15.8571	0	11.2714	92.8714
SF	2019-02-01	222.738	28.6905	0	113.571	365
SF	2019-02-01	147.738	140.952	0	184.524	473.214
SF	2019-02-01	237.262	143.69	31.0714	218.69	630.714
SF	2019-02-01	207.262	148.214	0	134.762	490.238
SF	2019-02-01	146.071	37.2619	0	100.595	283.929
SF	2019-03-01	305.357	12.1429	0	69.0476	386.548
SF	2019-03-01	380.714	147.857	0	170.833	699.405
SF	2019-03-01	250.595	32.8571	0	120.119	403.571
SF	2019-03-01	233.69	203.571	0	178.69	615.952
SF	2019-03-01	293.214	0	0	44.0476	337.262
SF	2019-04-01	74.5455	0	0	15.6566	90.202
SF	2019-04-01	222.929	56.5657	0	99.697	379.192
SF	2019-04-01	309.596	31.3131	0	16.3636	357.273
SF	2019-04-01	112.828	92.8283	0	98.1818	303.838
SF	2019-04-01	124.949	12.3232	0	64.8485	202.121
SF	2019-05-01	92.1111	39.4444	0	120.222	251.778
SF	2019-05-01	59.3333	171.667	30.2222	260.556	521.778
SF	2019-05-01	482.667	25.6667	0	172	680.333
SF	2019-05-01	388.556	125.667	0	163.333	677.556
SF	2019-05-01	261.333	0	0	208.667	470
SF	2019-06-01	120.595	67.619	0	37.381	225.595
SF	2019-06-01	120.952	211.19	0	74.0476	406.19
SF	2019-06-01	309.048	229.167	25.9524	391.19	955.357
SF	2019-06-01	186.19	86.1905	0	83.5714	355.952
SF	2019-06-01	110.714	28.9286	0	112.857	252.5
SF	2019-07-01	62.7273	78.8889	0	21.5152	163.131
SF	2019-07-01	14.7475	6.46465	26.4646	28.7879	76.4646
SF	2019-07-01	154.343	153.636	0	269.091	577.071
SF	2019-07-01	142.121	22.4242	0	71.7172	236.263
SF	2019-07-01	139.091	0	0	50.9091	190
AC	2018-08-01	29.8095	12.2857	0	47.9048	90
AC	2018-08-01	54.7619	2	0	21.619	78.381
AC	2018-08-01	117.905	0	0	86.381	204.286
AC	2018-08-01	148.381	8.7619	7.04762	3.04762	167.238
AC	2018-08-01	121.714	77.7143	0	2.95238	202.381
AC	2018-09-01	179.667	0	0	15.4444	195.111
AC	2018-09-01	241.778	17.4444	0	54.3333	313.556
AC	2018-09-01	228	15.5556	0	64.3333	307.889
AC	2018-09-01	98	29	0	46.2222	173.222
AC	2018-09-01	75.2222	17.7778	0	29.7778	122.778
AC	2018-10-01	49.697	89.899	0	68.7879	208.384
AC	2018-10-01	153.535	0	0	147.879	301.414
AC	2018-10-01	305.455	0	0	42.8283	348.283
AC	2018-10-01	199.091	61.0101	0	0	260.101
AC	2018-10-01	149.697	61.6162	0	27.5758	238.889
AC	2018-11-01	361.034	67.2414	0	95.0575	523.333
AC	2018-11-01	408.506	122.874	0	132.184	663.563
AC	2018-11-01	192.874	10	0	23.1034	225.977
AC	2018-11-01	91.8391	385.862	1.95402	246.552	726.207
AC	2018-11-01	406.552	24.7126	0	123.793	555.057
AC	2018-12-01	140.667	54.1667	0	36.3333	231.167
AC	2018-12-01	101.917	34.75	0	31.8333	168.5
AC	2018-12-01	367.667	89.8333	0	0	457.5
AC	2018-12-01	115.5	134.083	0	99.3333	348.917
AC	2018-12-01	40.75	4.08333	0	152.083	196.917
AC	2019-01-01	226.667	0	0	17.3563	244.023
AC	2019-01-01	141.264	3.10345	0	15.2874	159.655
AC	2019-01-01	266.207	70.8046	0	40.2299	377.241
AC	2019-01-01	148.506	12.6437	0	47.2414	208.391
AC	2019-01-01	223.678	33.2184	0	108.046	364.943
AC	2019-02-01	194.138	47.2414	56.5517	49.6552	347.586
AC	2019-02-01	351.609	114.598	0	14.7126	480.92
AC	2019-02-01	379.425	77.5862	0	22.1839	479.195
AC	2019-02-01	182.874	22.7586	0	47.5862	253.218
AC	2019-02-01	268.046	102.414	0	9.88506	380.345
AC	2019-03-01	341.619	63.9048	7.52381	28.381	441.429
AC	2019-03-01	315.429	74.0952	0	124.19	513.714
AC	2019-03-01	423.524	2.38095	0	22.9524	448.857
AC	2019-03-01	259.81	172.952	0	52.9524	485.714
AC	2019-03-01	140.476	45.2381	0	64.5714	250.286
AC	2019-04-01	57.4468	50.922	0	83.4752	191.844
AC	2019-04-01	61.3475	14.8936	15.6738	92.3404	184.255
AC	2019-04-01	178.652	0	0	59.6454	238.298
AC	2019-04-01	91.4894	26.383	0	20.7801	138.652
AC	2019-04-01	36.6667	5.74468	0	42.9787	85.3901
AC	2019-06-01	72.3333	39.6667	0	32.2222	144.222
AC	2019-06-01	116.556	0	12	69.7778	198.333
AC	2019-06-01	254.222	42.7778	0	93.8889	390.889
AC	2019-06-01	68.6667	41.1111	0	382.333	492.111
AC	2019-06-01	65.6667	53.8889	0	96.2222	215.778
AC	2019-07-01	148.889	22.5556	0	107.111	278.556
AC	2019-07-01	85.2222	11.8889	0	62.1111	159.222
AC	2019-07-01	96.1111	0	0	111.444	207.556
AC	2019-07-01	199	104.556	0	80.7778	384.333
AC	2019-07-01	216.889	37.4444	0	86.5556	340.889

## Sheet: PRECIPITATION
MONTH	AREA	PRECIPITATION (mm)
2018-08-01	SF	106.89
2018-09-01	SF	59.31
2018-10-01	SF	45.14
2018-11-01	SF	191.01
2018-12-01	SF	134.11
2019-01-01	SF	63.05
2019-02-01	SF	31.22
2019-03-01	SF	86.78
2019-04-01	SF	95.9
2019-05-01	SF	110.48
2019-06-01	SF	108.66
2019-07-01	SF	102.84
2018-08-01	AC	98.5
2018-09-01	AC	53.4
2018-10-01	AC	51.92
2018-11-01	AC	185.2
2018-12-01	AC	129.62
2019-01-01	AC	55.44
2019-02-01	AC	32.08
2019-03-01	AC	77.33
2019-04-01	AC	92.78
2019-05-01	AC	88.33
2019-06-01	AC	99.44
2019-07-01	AC	75.51
2018-08-01	MC	104.98
2018-09-01	MC	54.42
2018-10-01	MC	56
2018-11-01	MC	188.32
2018-12-01	MC	128.82
2019-01-01	MC	57.16
2019-02-01	MC	33.04
2019-03-01	MC	80.4
2019-04-01	MC	98.45
2019-05-01	MC	96.33
2019-06-01	MC	100.66
2019-07-01	MC	76.01
