# Supplementary material for: Litter inputs and standing stocks in riparian zones and streams under secondary forest and managed and abandoned cocoa agroforestry systems
Source: PeerJ journal article supplement (doi:10.7717/peerj.13787), 2022-12-01
Supplement: Table_S1_Peer_J_march22.pdf [file Table_S1_Peer_J_march22.pdf]

Table S1.

|                         | Df | AIC    | BIC    | logLik  | Deviatio | Chi Squared | Df | P(>Chi squared) |
|-------------------------|----|--------|--------|---------|----------|-------------|----|-----------------|
| <b>A. Leaves</b>        |    |        |        |         |          |             |    |                 |
| Null model              | 5  | 7478.7 | 7501.8 | -3734.3 | 7468.7   |             |    |                 |
| Time                    | 8  | 7419.1 | 7456.1 | -3701.6 | 7403.1   | 65.6        | 3  | < 0.001         |
| Null model              | 4  | 7481.7 | 7500.2 | -3736.8 | 7473.7   |             |    |                 |
| Site                    | 8  | 7419.1 | 7456.1 | -3701.6 | 7403.1   | 70.6        | 4  | < 0.001         |
| Null model              | 3  | 7533.4 | 7547.2 | -3763.7 | 7527.4   |             |    |                 |
| Site : Time             | 8  | 7419.1 | 7456.1 | -3701.6 | 7403.1   | 124.3       | 5  | < 0.001         |
| <b>B. Branches</b>      |    |        |        |         |          |             |    |                 |
| Null model              | 5  | 6155.8 | 6178.9 | -3072.9 | 6145.8   |             |    |                 |
| Time                    | 8  | 6151.5 | 6188.5 | -3067.8 | 6135.5   | 10.2        | 3  | 0.017           |
| Null model              | 4  | 6150.1 | 6168.6 | -3071.1 | 6142.1   |             |    |                 |
| Site                    | 8  | 6151.5 | 6188.5 | -3067.8 | 6135.5   | 6.6         | 4  | 0.159           |
| Null model              | 3  | 6155.2 | 6169.0 | -3074.6 | 6149.2   |             |    |                 |
| Site : Time             | 8  | 6151.5 | 6188.5 | -3067.8 | 6135.5   | 13.6        | 5  | 0.018           |
| <b>C. Reproductive</b>  |    |        |        |         |          |             |    |                 |
| Null model              | 5  | 8083.8 | 8106.9 | -4036.9 | 8073.8   |             |    |                 |
| Time                    | 8  | 8060.8 | 8097.8 | -4022.4 | 8044.8   | 29.0        | 3  | < 0.001         |
| Null model              | 4  | 8146.2 | 8164.7 | -4069.1 | 8138.2   |             |    |                 |
| Site                    | 8  | 8060.8 | 8097.8 | -4022.4 | 8044.8   | 93.4        | 4  | < 0.001         |
| Null model              | 3  | 8151.5 | 8165.3 | -4072.7 | 8145.5   |             |    |                 |
| Site : Time             | 8  | 8060.8 | 8097.8 | -4022.4 | 8044.8   | 100.6       | 5  | < 0.001         |
| <b>D. Miscellaneous</b> |    |        |        |         |          |             |    |                 |
| Null model              | 5  | 6153.0 | 6176.1 | -3071.5 | 6143.0   |             |    |                 |
| Time                    | 8  | 6149.9 | 6186.8 | -3066.9 | 6133.9   | 9.1         | 3  | 0.053           |
| Null model              | 4  | 6155.1 | 6173.5 | -3073.5 | 6147.1   |             |    |                 |
| Site                    | 8  | 6149.9 | 6186.8 | -3066.9 | 6133.9   | 13.2        | 4  | 0.051           |
| Null model              | 3  | 6157.5 | 6171.4 | -3075.8 | 6151.5   |             |    |                 |
| Site : Time             | 8  | 6149.9 | 6186.8 | -3066.9 | 6133.9   | 17.6        | 5  | 0.055           |
