# Supplementary material for: Litter inputs and standing stocks in riparian zones and streams under secondary forest and managed and abandoned cocoa agroforestry systems
Source: PeerJ journal article supplement (doi:10.7717/peerj.13787), 2022-12-01
Supplement: Table_S2_Peer_J_march_22.pdf [file Table_S2_Peer_J_march_22.pdf]

Table S2.

|                         | Df | AIC    | BIC    | logLik  | Deviation | Chi square | Df | P > (Chi square) |
|-------------------------|----|--------|--------|---------|-----------|------------|----|------------------|
| <b>A. Leaves</b>        |    |        |        |         |           |            |    |                  |
| Null model              | 5  | 3485.5 | 3504.7 | -1737.8 | 3475.5    |            |    |                  |
| Time                    | 8  | 3448.3 | 3478.9 | -1716.1 | 3432.3    | 43.3       | 3  | < 0.001          |
| Null model              | 4  | 3465.2 | 3480.5 | -1728.6 | 3457.2    |            |    |                  |
| Site                    | 8  | 3448.3 | 3478.9 | -1716.1 | 3432.3    | 24.9       | 4  | 0.052            |
| Null model              | 3  | 3494.4 | 3505.9 | -1744.2 | 3488.4    |            |    |                  |
| Site : Time             | 8  | 3448.3 | 3478.9 | -1716.1 | 3432.3    | 56.1       | 5  | < 0.001          |
| <b>B. Branches</b>      |    |        |        |         |           |            |    |                  |
| Null model              | 5  | 2613.9 | 2633   | -1301.9 | 2603.9    |            |    |                  |
| Time                    | 8  | 2602.8 | 2633.4 | -1293.4 | 2586.8    | 48.5       | 3  | < 0.001          |
| Null model              | 4  | 2643.3 | 2658.6 | -1317.7 | 2635.3    |            |    |                  |
| Site                    | 8  | 2602.8 | 2633.4 | -1293.4 | 2586.8    | 17.0       | 4  | 0.067            |
| Null model              | 3  | 2649.8 | 2661.3 | -1321.9 | 2643.8    |            |    |                  |
| Site : Time             | 8  | 2602.8 | 2633.4 | -1293.4 | 2586.8    | 57.9       | 5  | < 0.001          |
| <b>C. Reproductive</b>  |    |        |        |         |           |            |    |                  |
| Null model              | 5  | 3405.8 | 3424.9 | -1697.9 | 3395.8    |            |    |                  |
| Time                    | 8  | 3400.2 | 3430.8 | -1692.1 | 3384.2    | 11.6       | 3  | 0.009            |
| Null model              | 4  | 3423.1 | 3438.4 | -1707.5 | 3415.1    |            |    |                  |
| Site                    | 8  | 3400.2 | 3430.8 | -1692.1 | 3384.2    | 30.9       | 4  | < 0.001          |
| Null model              | 3  | 3424.1 | 3435.6 | -1709.1 | 3418.1    |            |    |                  |
| Site : Time             | 8  | 3400.2 | 3430.8 | -1692.1 | 3384.2    | 34.0       | 5  | < 0.001          |
| <b>D. Miscellaneous</b> |    |        |        |         |           |            |    |                  |
| Null model              | 5  | 3099.2 | 3118.3 | -1544.6 | 3089.2    |            |    |                  |
| Time                    | 8  | 3097.7 | 3128.3 | -1540.9 | 3081.7    | 7.5        | 3  | 0.049            |
| Null model              | 4  | 3099.3 | 3114.7 | -1545.7 | 3091.3    |            |    |                  |
| Site                    | 8  | 3097.7 | 3128.3 | -1540.9 | 3081.7    | 9.6        | 4  | 0.051            |
| Null model              | 3  | 3097.9 | 3109.4 | -1545.9 | 3091.9    |            |    |                  |
| Site : Time             | 8  | 3097.7 | 3128.3 | -1540.9 | 3081.7    | 10.1       | 5  | 0.047            |
