# Supplementary material for: Litter inputs and standing stocks in riparian zones and streams under secondary forest and managed and abandoned cocoa agroforestry systems
Source: PeerJ journal article supplement (doi:10.7717/peerj.13787), 2022-12-01
Supplement: Table_S3_Peer_J_march_22.pdf [file Table_S3_Peer_J_march_22.pdf]

Table S3.

|                         | Df | AIC    | BIC    | logLik  | Deviation | Chi square | Df | P (>Chi square) |
|-------------------------|----|--------|--------|---------|-----------|------------|----|-----------------|
| <b>A. Leaves</b>        |    |        |        |         |           |            |    |                 |
| Null model              | 5  | 3454.6 | 3473.7 | -1722.3 | 3444.6    |            |    |                 |
| Time                    | 8  | 3456.8 | 3487.4 | -1720.4 | 3440.8    | 3.8        | 3  | 0.279           |
| Null model              | 4  | 3500.1 | 3515.4 | -1746.0 | 3492.1    |            |    |                 |
| Site                    | 8  | 3456.8 | 3487.4 | -1720.4 | 3440.8    | 51.3       | 4  | < 0.001         |
| Null model              | 3  | 3498.5 | 3509.9 | -1746.2 | 3492.5    |            |    |                 |
| Site : Time             | 8  | 3456.8 | 3487.4 | -1720.4 | 3440.8    | 51.7       | 5  | < 0.001         |
| <b>B. Branches</b>      |    |        |        |         |           |            |    |                 |
| Null model              | 5  | 2667.4 | 2686.6 | -1328.7 | 2657.4    |            |    |                 |
| Time                    | 8  | 2670.7 | 2701.3 | -1327.3 | 2654.7    | 2.7        | 3  | 0.435           |
| Null model              | 4  | 2666.2 | 2681.5 | -1329.1 | 2658.2    |            |    |                 |
| Site                    | 8  | 2670.7 | 2701.3 | -1327.3 | 2654.7    | 3.5        | 4  | 0.480           |
| Null model              | 3  | 2664.8 | 2676.2 | -1329.4 | 2658.8    |            |    |                 |
| Site : Time             | 8  | 2670.7 | 2701.3 | -1327.3 | 2654.7    | 4.1        | 5  | 0.538           |
| <b>C. Reproductive</b>  |    |        |        |         |           |            |    |                 |
| Null model              | 5  | 3171.4 | 3190.5 | -1580.7 | 3161.4    |            |    |                 |
| Time                    | 8  | 3172.5 | 3203.1 | -1578.2 | 3156.5    | 4.9        | 3  | 0.181           |
| Null model              | 4  | 3184.3 | 3199.6 | -1588.2 | 3176.3    |            |    |                 |
| Site                    | 8  | 3172.5 | 3203.1 | -1578.2 | 3156.5    | 19.8       | 4  | < 0.001         |
| Null model              | 3  | 3183.5 | 3195.0 | -1588.8 | 3177.5    |            |    |                 |
| Site : Time             | 8  | 3172.5 | 3203.1 | -1578.2 | 3156.5    | 21.0       | 5  | 0.091           |
| <b>D. Miscellaneous</b> |    |        |        |         |           |            |    |                 |
| Null model              | 5  | 3225.8 | 3245.0 | -1607.9 | 3215.8    |            |    |                 |
| Time                    | 8  | 3220.1 | 3250.7 | -1602.0 | 3204.1    | 11.7       | 3  | 0.183           |
| Null model              | 4  | 3239.8 | 3255.0 | -1615.9 | 3231.8    |            |    |                 |
| Site                    | 8  | 3220.1 | 3250.7 | -1602.0 | 3204.1    | 27.7       | 4  | < 0.001         |
| Null model              | 3  | 3240.6 | 3252.1 | -1617.3 | 3234.6    |            |    |                 |
| Site : Time             | 8  | 3220.1 | 3250.7 | -1602.0 | 3204.1    | 30.5       | 5  | 0.087           |
