# Supplementary material for: Litter inputs and standing stocks in riparian zones and streams under secondary forest and managed and abandoned cocoa agroforestry systems
Source: PeerJ journal article supplement (doi:10.7717/peerj.13787), 2022-12-01
Supplement: Table_S4_Peer_J_march_22.pdf [file Table_S4_Peer_J_march_22.pdf]

Table S4.

|                         | Df | AIC    | BIC    | logLik  | Deviation | Chi square | Df | P (>Chi square) |
|-------------------------|----|--------|--------|---------|-----------|------------|----|-----------------|
| <b>A. Leaves</b>        |    |        |        |         |           |            |    |                 |
| Null model              | 5  | 2055.4 | 2071.1 | -1022.7 | 2045.4    |            |    |                 |
| Time                    | 8  | 2049.4 | 2074.5 | -1016.7 | 2033.4    | 12.0       | 3  | 0.007           |
| Null model              | 4  | 2086.4 | 2098.9 | -1039.2 | 2078.4    |            |    |                 |
| Site                    | 8  | 2049.4 | 2074.5 | -1016.7 | 2033.4    | 45.0       | 4  | < 0.001         |
| Null model              | 3  | 2088.9 | 2098.3 | -1041.5 | 2082.9    |            |    |                 |
| Site : Time             | 8  | 2049.4 | 2074.5 | -1016.7 | 2033.4    | 49.5       | 5  | < 0.001         |
| <b>B. Branches</b>      |    |        |        |         |           |            |    |                 |
| Null model              | 5  | 1905.2 | 1920.9 | -947.57 | 1895.2    |            |    |                 |
| Time                    | 8  | 1910.4 | 1935.6 | -947.22 | 1894.4    | 0.7        | 3  | 0.870           |
| Null model              | 4  | 1937.9 | 1950.5 | -964.95 | 1929.9    |            |    |                 |
| Site                    | 8  | 1910.4 | 1935.6 | -947.22 | 1894.4    | 35.5       | 4  | < 0.001         |
| Null model              | 3  | 1936.1 | 1945.5 | -965.06 | 1930.1    |            |    |                 |
| Site : Time             | 8  | 1910.4 | 1935.6 | -947.22 | 1894.4    | 35.7       | 5  | 0.099           |
| <b>C. Reproductive</b>  |    |        |        |         |           |            |    |                 |
| Null model              | 5  | 1653.2 | 1668.9 | -821.62 | 1643.2    |            |    |                 |
| Time                    | 8  | 1657.1 | 1682.2 | -820.55 | 1641.1    | 2.1        | 3  | 0.544           |
| Null model              | 4  | 1671.3 | 1683.9 | -831.66 | 1663.3    |            |    |                 |
| Site                    | 8  | 1657.1 | 1682.2 | -820.55 | 1641.1    | 22.2       | 4  | < 0.001         |
| Null model              | 3  | 1670.0 | 1679.4 | -832.00 | 1664.0    |            |    |                 |
| Site : Time             | 8  | 1657.1 | 1682.2 | -820.55 | 1641.1    | 22.9       | 5  | < 0.001         |
| <b>D. Miscellaneous</b> |    |        |        |         |           |            |    |                 |
| Null model              | 5  | 2200.7 | 2216.4 | -1095.3 | 2190.7    |            |    |                 |
| Time                    | 8  | 2203.7 | 2228.8 | -1093.8 | 2187.7    | 3.0        | 3  | 0.3905          |
| Null model              | 4  | 2232.1 | 2244.7 | -1112.1 | 2224.1    |            |    |                 |
| Site                    | 8  | 2203.7 | 2228.8 | -1093.8 | 2187.7    | 36.4       | 4  | < 0.001         |
| Null model              | 3  | 2230.1 | 2239.6 | -1112.1 | 2224.1    |            |    |                 |
| Site : Time             | 8  | 2203.7 | 2228.8 | -1093.8 | 2187.7    | 36.4       | 5  | < 0.001         |
